1     **Local Enrichment of HP1alpha at Telomeres Alters Their Structure and Regulation of**  
2                                    **Telomere Protection**

3  
4     Tracy T. Chow<sup>1</sup>, Xiaoyu Shi<sup>2</sup>, Jen-Hsuan Wei<sup>1,3</sup>, Juan Guan<sup>2</sup>, Guido Stadler<sup>4</sup>, Bo Huang<sup>2,5</sup>,  
5                                    Elizabeth H. Blackburn<sup>1,6\*</sup>

6  
7     <sup>1</sup>Department of Biochemistry and Biophysics, University of California, San Francisco, San  
8     Francisco, CA, 94143, USA

9     <sup>2</sup>Department of Pharmaceutical Chemistry, University of California, San Francisco, San  
10    Francisco, CA, 94143, USA

11    <sup>3</sup>Howard Hughes Medical Institute, University of California, San Francisco, San Francisco, CA  
12    94143, USA

13    <sup>4</sup>Berkeley Lights Inc. Emeryville, CA 94608 USA

14    <sup>5</sup>Chan Zuckerberg Biohub, San Francisco, CA 94158 USA

15    <sup>6</sup>Salk Institute, San Diego, CA 92037 USA

16

17    \*Correspondence: [Elizabeth.Blackburn@ucsf.edu](mailto:Elizabeth.Blackburn@ucsf.edu)

18    Phone: (415) 476-7284

19

20    Keywords: Telomere, chromatin structure, heterochromatin, DNA damage, telomerase, cancer,

21    HP1 $\alpha$

22

23

24

25

26

27 **ABSTRACT**

28 Enhanced telomere maintenance is evident in malignant cancers. While telomeres are thought  
29 to be inherently heterochromatic, detailed mechanisms of how epigenetic modifications impact  
30 telomere protection and structures are largely unknown in human cancers. Here we develop a  
31 molecular tethering approach to experimentally enrich heterochromatin protein HP1 $\alpha$  specifically  
32 at telomeres. This results in increased deposition of H3K9me3 at cancer cell telomeres.  
33 Telomere extension by telomerase is attenuated, and damage-induced foci at telomeres are  
34 reduced, indicating augmentation of telomere stability. Super resolution STORM imaging shows  
35 an unexpected increase in irregularity of telomeric structure. Telomere-tethered chromo shadow  
36 domain (CSD) mutant I165A of HP1 $\alpha$  abrogates both the inhibition of telomere extension and  
37 the irregularity of telomeric structure, suggesting the involvement of at least one HP1 $\alpha$ -ligand in  
38 mediating these effects. This work presents a new approach to specifically manipulate the  
39 epigenetic status locally at telomeres to uncover insights into molecular mechanisms underlying  
40 telomere structural dynamics.

41

42

43

44

45

46

47

48

49

50

51

52 Telomere maintenance is indispensable for indefinite proliferation of cancer cells. Mammalian  
53 telomeres consist of tracts of hexameric DNA repeats (5'-TTAGGG-3') bound by protective non-  
54 histone proteins in a complex called shelterin<sup>1, 2</sup>. Paradoxically, in spite of the nucleosome-  
55 disfavoring properties of telomeric repeats<sup>3</sup>, mammalian telomeric DNA is also organized into  
56 closely packed nucleosomes<sup>4</sup>. It is unknown how the resulting telomeric chromatin domain,  
57 consisting of the telomere nucleosomal chromatin plus shelterin complex, establishes a capping  
58 structure to maintain genome integrity<sup>5, 6</sup>. While functions associated with shelterin itself have  
59 been widely studied, molecular details of how this peculiar telomere chromatin impacts  
60 mammalian telomere maintenance remain largely unexplored.

61  
62 Telomere chromatin is thought to be inherently condensed heterochromatin primarily based on  
63 findings in yeast<sup>7, 8</sup>, *Drosophila*<sup>9</sup> and mouse<sup>10</sup>. In these organisms, establishment of telomeric  
64 and subtelomeric heterochromatin is crucial for chromosomal end protection<sup>5</sup>. However, recent  
65 studies suggest that human and *Arabidopsis* telomere chromatins are relatively dynamic,  
66 characterized by a mix of heterochromatic and euchromatic marks, as well as enrichments of  
67 histone modifications associated with active transcription<sup>11-14</sup>. Besides canonical telomere  
68 capping, telomeric chromatin also regulates telomere position effect (TPE)<sup>15</sup>, telomere  
69 transcription<sup>16</sup>, homologous recombination at telomeres<sup>17, 18</sup>, cellular differentiation<sup>19</sup>, and  
70 nuclear reprogramming<sup>20</sup>.

71  
72 Roles for epigenetic regulation of telomere maintenance have been sought in many studies.  
73 Knockout of various histone modifying enzymes such as histone methyltransferases  
74 SUV39H1/2, SUV4-20H1/2<sup>10, 17, 21</sup> result in defective telomere function, aberrantly increased  
75 telomere length, and chromosomal instability. Depletion of yeast histone methyltransferase  
76 Dot1<sup>22</sup> and its homolog in mouse (Dot1L)<sup>23</sup>, mammalian histone modifier ATRX and its chaperon  
77 DAXX<sup>24, 25</sup>, yeast histone deacetylases Sir2<sup>26</sup> and its orthologs in mouse (Sirt1)<sup>27</sup> and human

78 (Sirt6)<sup>28</sup> result in a range of altered or defective telomere maintenance phenotypes. These  
79 include alteration in telomere length<sup>10, 21</sup>, recombination which characterizes alternative telomere  
80 lengthening (ALT)<sup>10, 17, 29</sup>, increased telomere fusion and premature senescence<sup>28</sup>, TPE<sup>15</sup>,  
81 telomere transcription<sup>25</sup>, or DNA damage at the telomeres<sup>27</sup>. However, in such knockout or  
82 knockdown studies, it is very difficult to interpret the molecular mechanisms underlying the  
83 dynamics of telomeric chromatin because they take place in settings of global genomic changes  
84 in chromatin and histone modifying enzymes. Therefore, we desired to set up an alternative  
85 approach to engineer localized manipulations of telomere chromatin.

86

87 A common feature of heterochromatin-mediated telomere protection in *Drosophila* and yeast is  
88 that their telomeric and subtelomeric chromatins respectively, are enriched in heterochromatin  
89 marks such as trimethylation of lysine 9 of histone H3 (H3K9me3)<sup>30</sup>. H3K9me3 provides a high  
90 affinity binding site for HP1 (heterochromatin protein 1), and recruits histone methyltransferase  
91 SUV39H to catalyze the propagation of this mark to establish heterochromatin<sup>31</sup>. Extensive  
92 studies of heterochromatin marks, using chromatin immunoprecipitation (ChIP) and genome-  
93 wide chromatin state mapping, have reported enrichment of H3K9me3 and other  
94 heterochromatin marks in mouse subtelomere and telomeres<sup>30</sup>. In striking contrast to this  
95 reported high H3K9me3 at mouse telomeres, unexpectedly low density of telomere H3K9me3  
96 and rather infrequent HP1 are naturally localized at human telomeres<sup>11, 14, 32-35</sup>. This provides an  
97 opportunity to enhance the presence of this naturally occurring component of telomeric  
98 chromatin to study its role in telomere biology.

99

100 In this report, we present a novel approach to study the consequences of locally altering  
101 telomere chromatin properties on the key functions of telomeres. We enrich  
102 heterochromatinization at telomeres by fusing HP1alpha (HP1α) to the telomere binding  
103 shelterin protein TRF1. We find that deposition of heterochromatin marks at telomeres is

104 increased and telomerase-mediated telomere extension is attenuated. Mutational studies of  
105 such telomere-tethered HP1 $\alpha$  show the chromo shadow domain of the telomere-tethered HP1 $\alpha$   
106 is involved in attenuating telomere extension. Additionally, DNA damage responses at  
107 telomeres, triggered by either expressing mutant-template telomerase RNA (hTR) or depletion  
108 of shelterin TRF2, are reduced, suggesting enhanced telomere stability. Direct super-resolution  
109 visualization of this HP1 $\alpha$ -tethered telomere chromatin in cells by stochastic optical  
110 reconstruction microscopy (STORM) imaging shows a previously unsuspected less globular,  
111 more irregularly-shaped telomere structures. These findings provide a new platform for  
112 understanding the crosstalk between altered chromatin environment, epigenetic regulation and  
113 telomere maintenance.

114

## 115 **RESULTS**

### 116 **A model system to study HP1 $\alpha$ function at telomeres**

117 To study how altered telomere chromatin regulates its maintenance, we set up a controlled  
118 system to enhance heterochromatin in a locus-specific manner. We fused shelterin TRF1, which  
119 confers telomeric locus-specificity, to HP1 $\alpha$ , a protein involved in heterochromatin establishment  
120 and maintenance. HP1 $\alpha$  contains a conserved N-terminal chromo domain (CD) that binds to  
121 dimethylated and trimethylated H3K9 (H3K9me<sub>2/3</sub>) and a C-terminal chromo shadow domain  
122 (CSD) for dimerization and ligand binding<sup>31, 36</sup>. These two domains are joined by a flexible hinge  
123 domain (Fig. 1a)<sup>31</sup>.

124

125 To validate our system, EGFP-tagged TRF1 fused with HP1 $\alpha$  (Fig. 1a) was transiently  
126 cotransfected with mCherry-tagged TRF2, a core shelterin component, and tested for  
127 colocalization at telomeres (Fig. 1b) in human bladder cancer UM-UC3 cells. As expected,  
128 EGFP-HP1 $\alpha$  is capable of localizing to non-telomeric genomic regions, resulting in a  
129 significantly higher total average HP1 $\alpha$  occupancy (~16.7% area per nucleus) compared to

130 EGFP-TRF1 (~5.0%) that localized exclusively to telomeres (Fig. 1c), as measured by percent  
131 EGFP per nucleus. Meanwhile, TRF1HP1 $\alpha$  also localized to genomic regions other than  
132 telomeres with no significant difference of average nucleus occupancy (~17.3%) compared to  
133 control HP1 $\alpha$  (~16.7%). Thus, TRF1HP1 $\alpha$  also retained the functional abilities of HP1 $\alpha$  for  
134 targeting and chromatin spreading (Fig. 1c). A point mutation in the CD domain of the  
135 TRF1HP1 $\alpha$ -fusion construct (V22M), which abrogates recognition of H3K9me3 by HP1 $\alpha$ ,  
136 maintained its ability to localize at telomeres, as will be discussed further below, and reverted  
137 average EGFP occupancy in the nucleus to ~6.4%. Average colocalization with TRF2 was  
138 significantly higher for both EGFP-TRF1HP1 $\alpha$  (~74.2%) and EGFP-TRF1 (~62.1%) compared  
139 to EGFP-HP1 $\alpha$  alone (~46.9%) (Fig 1d). Thus, TRF1HP1 $\alpha$  is expressed and specifically  
140 enriched at telomeres.

141

#### 142 **TRF1HP1 $\alpha$ expression increases H3K9me3 per H3 at telomeres**

143 In addition to microscopy, we also used chromatin immunoprecipitation (ChIP) to follow the  
144 genomic localization of stably expressed TRF1HP1 $\alpha$  cells (Fig. 1e-j). Immunoprecipitated  
145 chromatin was hybridized with either telomeric or control centromeric (CENPB) probe (Fig. 1f).  
146 After normalizing to intensity of 10% total chromatin input, TRF1HP1 $\alpha$  showed ~28 fold  
147 increased average HP1 $\alpha$  at telomeres compared to controls (Fig. 1f-g). While TRF1  
148 overexpression resulted in a slight decrease of H3 at telomeres compared to vector only (Vonly)  
149 or HP1 $\alpha$ , each of the three control groups showed higher H3 compared to TRF1HP1 $\alpha$  (Fig. 1f,  
150 h). Combining all three control groups, TRF1HP1 $\alpha$  showed less H3 (~0.7 fold) per telomere  
151 (Fig. 1f, h). We then asked if H3K9me3 heterochromatin marks at telomeres were increased.  
152 Upon normalizing to telomeric H3, TRF1HP1 $\alpha$  showed a small but significant (~1.5 fold)  
153 increase of H3K9me3 at telomeres. (Fig. 1f, i). Meanwhile, there was no significant change in  
154 TRF2 occupancy, a core component of shelterin complex (Fig. 1f, j). Moreover, TRF1HP1 $\alpha$  by  
155 itself did not induce DNA damage at telomeres, as will be discussed in detail below, suggesting

156 shelterin integrity remained intact. See Supplementary Fig. 1 for independent, uncropped  
157 images of triplicate ChIP experiments. In summary, we established a controlled system to alter  
158 telomere heterochromatin by HP1 $\alpha$  tethering, resulting in increased H3K9me3 at telomeres.

159

160

### 161 **TRF1HP1 $\alpha$ attenuates telomere extension**

162 To investigate if tethered HP1 $\alpha$ -induced heterochromatin regulates telomere extension by  
163 telomerase, EGFP-tagged TRF1HP1 $\alpha$  or corresponding control groups (Vonly, TRF1, HP1 $\alpha$ )  
164 were introduced into UM-UC3 cells via lentiviral construct infection. Blasticidin-selected cells  
165 were FACS sorted for medium EGFP expression (assigned as Population Doubling PD0).  
166 Protein expression was validated by western blot analysis (Supplementary Fig. 2). All  
167 overexpression cell lines showed only minimal alteration in telomere length up to ~PD80  
168 (Supplementary Fig. 3). This observation is consistent with a previous report that only long term  
169 culturing of TRF1 overexpression in certain cancer cells resulted in telomere shortening<sup>37</sup>. To  
170 better resolve changes in length, telomere extension was enhanced by overexpressing WT hTR  
171 (template specifying 5'TTAGGG repeats), which we have previously shown lengthens telomeres  
172 in UM-UC3 cells during the following few days in culture<sup>38</sup>. WT hTR was introduced via a  
173 second round of infection with the experimental set-up diagrammed in Fig. 2a. Southern blotting  
174 (Telomere Restriction Fragment Length) analysis showed that the telomere-tethered TRF1HP1 $\alpha$   
175 expression attenuated telomere extension compared to Vonly, TRF1-alone or HP1 $\alpha$ -alone  
176 controls (Fig. 2b-c).

177

178 Uncapped telomeres elicit senescence in cultured human fibroblasts. We used the senescence-  
179 associated beta-galactosidase ( $\beta$ -gal) assay to determine if TRF1HP1 $\alpha$  influenced replicative  
180 senescence. High PD normal human foreskin fibroblast BJ cells showed the expected increase  
181 of  $\beta$ -gal fluorescence units (~2.6 fold higher than at lower PD; Fig. 2d-e). However, in two

182 primary fibroblast cell lines, BJ or WI-38, there were no significant differences among  
183 TRF1HP1 $\alpha$  or corresponding Vonly or TRF1 control groups (Fig. 2f-h). Thus, tethered-HP1 $\alpha$  at  
184 telomeres did not exacerbate replicative senescence in fibroblasts, further validating the intact  
185 functionality of the manipulated telomeric chromatin domain.

186

### 187 **Tethering TRF1HP1 $\alpha$ containing mutations within HP1 $\alpha$**

188 To rule out potential indirect effects due to tethering of TRF1HP1 $\alpha$  to non-telomeric HP1 $\alpha$   
189 genomic loci and to understand mechanistically how HP1 $\alpha$  inhibited telomere elongation, HP1 $\alpha$   
190 constructs carrying various characterized separation-of-function mutations fused with TRF1, as  
191 above, were introduced into UM-UC3 cells (Fig. 3a): (i) CD mutant V22M<sup>39</sup>, defective in  
192 recognizing H3K9me3 marks; CSD mutants (ii) I165A<sup>39</sup>, deficient in dimerization and ligand  
193 binding and (iii) W174A<sup>39</sup>, which can dimerize but is deficient in ligand binding; (iv) N-terminal  
194 phosphorylation mutant NS2A<sup>40</sup>, to perturb oligomerization; and (v) hinge mutant KRKAAA<sup>36, 41</sup>,  
195 deficient in HP1 $\alpha$  DNA / RNA interaction (Fig. 3a).

196

197 Validation of the ability of these mutant proteins to localize to telomeres or other genomic  
198 regions was performed as described for Fig. 1b-d. WT TRF1HP1 $\alpha$  and all mutants tested had  
199 considerable amounts of tethering to other genomic regions except for V22M or V22MI165A  
200 (which do not recognize H3K9me3) (Fig. 3b). Average HP1 $\alpha$  nucleus occupancy was reduced in  
201 V22M (~6.4%) and the double mutant V22MI165A (~6.3%), but not I165A (~27.1%), compared  
202 to WT TRF1HP1 $\alpha$  (~22.5%) (Fig. 3b, c). Consistent patterns were observed by quantifying total  
203 numbers of fusion protein spots per nucleus (Supplementary Fig. 4). Thus, loss of H3K9me3  
204 binding by V22M or V22MI165A resulted in deficient anchorage to non-telomeric chromatin.

205

206 However, all mutants, including V22M and V22MI165A, were efficiently tethered at the  
207 telomeres via their fused TRF1 (~67.1%-83.4% co-localization; Fig. 3b, d). Thus, in this



208 controlled tethering system, telomere anchorage of V22M was efficiently driven by its TRF1  
209 fusion and did not require HP1 $\alpha$  recognition of H3K9me2/3, that might potentially have  
210 contributed to non-telomeric localization. Therefore, we deliberately used V22M to control for  
211 possible indirect effects due to tethering of TRF1 to non-telomeric HP1 $\alpha$  genomic sites.  
212 Meanwhile, there was no significant change in number of TRF2 foci per nucleus (Fig. 3e).

213

### 214 **Chromo shadow domain of HP1 $\alpha$ attenuates telomere extension**

215 To determine which domain functions of HP1 $\alpha$  control telomere extension by telomerase, we  
216 generated cells stably overexpressing TRF1HP1 $\alpha$ -constructs harboring various mutations within  
217 HP1 $\alpha$  (Fig. 3a-d), using the experimental set-up shown (Fig. 2a). Interestingly, WT TRF1HP1 $\alpha$   
218 and V22M limited telomere extension to similar extents (Fig. 3f, h). Hence, because TRF1  
219 tethering of HP1 $\alpha$  to telomeres bypassed the need for H3K9me2/3 recognition for HP1 $\alpha$   
220 recruitment to telomeres, HP1 $\alpha$  recognition of H3K9me2/3 *per se* is not required for this  
221 inhibition of telomere extension. In contrast, I165A abolished the inhibition of telomere  
222 lengthening, as did V22MI165A. Since I165A abrogates both dimerization and ligand binding,  
223 we sought to separate which function was primary in this regulation of telomerase action. An  
224 additional CSD mutant W174A, which is deficient in ligand binding but can still dimerize, only  
225 partially restored the inhibition of lengthening rate (Fig. 3g, i). Thus, because dimerization was  
226 not sufficient to fully inhibit telomerase action down to the WT TRF1HP1 $\alpha$  level, the ligand  
227 binding (and possibly also dimerization) function of CSD is required to inhibit telomere  
228 extension. Finally, N-terminal phosphorylation and the hinge DNA-binding domain were not  
229 required to inhibit telomere extension (mutants NS2A and KRKAAA in Fig. 3g, i).

230

### 231 **TRF1HP1 $\alpha$ reduces telomere damage induced by mutant hTR**

232 Knowing that TRF1HP1 $\alpha$  inhibited telomere extension (Fig. 2, 3), using an independent readout  
233 for telomerase function, we determined whether TRF1HP1 $\alpha$ -induced inhibition of telomerase

234 would lead to less incorporation of mutant hTR-specified telomeric DNA, and hence lead to a  
235 diminished DNA-damage response at telomeres. Incorporated mutant telomere repeats cannot  
236 bind shelterin proteins, leading to rapid uncapping and localized telomere damage foci<sup>42</sup>. Cells  
237 were infected on Day 0 with WT hTR or mutant hTRs, either 47A (5'TTTGGG)<sup>38</sup> or TSQ1  
238 (5'GTTGCG)<sup>43</sup>, and selected for stable expression after 48h. On day 5, 53BP1 DNA damage  
239 foci present at telomeres, also referred to as telomere dysfunction-induced foci (TIFs), were  
240 increased (Fig. 4a-c) compared to WT hTR (Fig. 4d, e). We tested TIF induction early, when cell  
241 growth was only mildly affected (Supplementary Fig. 5). Introduction of TRF1HP1 $\alpha$  yielded  
242 fewer average 47A-induced TIFs (~13.4%) compared to controls Vonly (~23.8%), TRF1  
243 (~28.6%) and HP1 $\alpha$  (~23.8%) (Fig. 4a-b). Similar findings were also observed with TSQ1  
244 treatment (Fig. 4c). Moreover, WT TRF1HP1 $\alpha$  (~13.4%) and V22M (~16.7%) showed similar  
245 TIFs (Fig. 4a-b). However, elevated TIFs were observed in CSD mutants I165A (~27.7%),  
246 W174A (~22.6%) and V22MI165A (~26.8%). In cells overexpressing WT hTR, minimal baseline  
247 DNA damage at telomeres was observed in corresponding controls (ranging from 4.1%-7.5%;  
248 Fig. 4d-e) or Vonly (5.8%-8.9%; Fig. 4f).

249  
250 In these experiments, the DNA damage caused by incorporated mutant repeats depends on  
251 telomerase action at telomeres. We showed that WT TRF1HP1 $\alpha$  inhibited telomere extension to  
252 similar extents as mutants V22M, NS2A and KRKAAA (Fig. 3). If reduced TIF levels were solely  
253 due to telomerase inhibition, we would expect that TIF induction upon 47A expression would be  
254 similar with all four fusion proteins. However, notably, upon 47A expression, NS2A and  
255 KRKAAA showed more TIFs compared to WT and V22M TRF1HP1 $\alpha$  (Fig. 4a-b). These results  
256 indicate a separation of HP1 $\alpha$  functions: on the one hand, in regulating telomere extension via  
257 its C-terminal CSD (ligand binding and dimerization) and on the other hand, in DNA-damage  
258 reduction (via its N-terminal CD and hinge domains).

259

260 **Tethered HP1 $\alpha$  reduces telomere damage induced by siTRF2**

261 To further study the direct telomere-protective effect of HP1 $\alpha$ , we used two additional,  
262 independent approaches. First, we induced telomere damage by efficiently knocking down  
263 TRF2 with si-TRF2 (Fig. 5a). Baseline TIFs were quantified using control non-targeting si-RNA  
264 (Fig. 5b). TRF1HP1 $\alpha$  mildly protected from siTRF2-induced telomere damage (Fig. 5c).  
265 Furthermore, comparing across all of the TRF1HP1 $\alpha$  mutants, the pattern of allele-specific  
266 effects on TRF2-depletion-induced TIFs closely paralleled their corresponding pattern on 47A-  
267 hTR-induced TIFs (compare Fig. 4b with Fig. 5c). This similarity of protective effects, against  
268 both telomerase-independent (TRF2 knock-down) and telomerase-dependent (47A hTR-  
269 induced) damage, indicated that in addition to its inhibitory effect on telomerase action,  
270 telomere-tethered WT TRF1HP1 $\alpha$  can also protect telomeres.

271  
272 Independently, we also developed a CRISPR / Cas9-based telomeric DNA-cutting strategy to  
273 induce telomere-specific damage in cells (Supplementary Fig. 6). Interestingly, expressing  
274 either TRF1 alone or telomere-tethered WT TRF1HP1 $\alpha$ , reduced CRISPR-induced telomere  
275 DNA cutting to similar extent in UM-UC3 cells. In summary, employing different approaches to  
276 induce telomeric damage has uncovered different aspects of how tethered HP1 $\alpha$  affects  
277 telomere protection.

278

279 **TRF1HP1 $\alpha$  increases irregularly-shaped telomere structures**

280 Telomere structures are smaller than the diffraction-limited resolution (~250 nm) of conventional  
281 light microscopy<sup>44-46</sup>. Under stochastic optical reconstruction microscopy (STORM), the great  
282 majority of WT telomeres appear as spherical, globular structures<sup>44-46</sup>. Using STORM, we  
283 examined whether HP1 $\alpha$  tethering altered the size or globular shape of telomeres. Under our  
284 conditions, three-dimensional (3D) STORM provided XY precision of ~30 nm and Z resolution of  
285 ~70 nm<sup>47</sup>. Cells stably expressing TRF1HP1 $\alpha$ , or corresponding control groups (TRF1, HP1 $\alpha$ ),

286 were collected for telomere length analysis or fixed for STORM analysis. We first verified that all  
287 experimental groups, collected at earliest passage after blasticidin selection (Day 8 to 9 post  
288 lentiviral infection), showed similar population telomere lengths (Fig. 6a). Therefore, any  
289 observed telomere shape changes at the population level should not be a result of average  
290 telomere length alteration.

291  
292 3D STORM showed significantly better resolution compared to conventional widefield imaging  
293 (Fig. 6b top and middle panels). The overlay image also allowed us to exclude any non-  
294 telomeric background, ensuring the identified clusters correspond to telomeres (Fig. 6b bottom  
295 panel). To quantify structural changes of individual telomeres, we measured the radius of  
296 gyration ( $R_g$ ) of each cluster.  $R_g$  represented the root-mean-square distance of the localization  
297 points from the center of mass of a cluster according to  $R_g^2 = \frac{1}{N} \sum_{k=1}^N (\vec{r}_k - \vec{r}_{\text{center-of-mass}})^2$ ,  
298 where  $\vec{r}$  denotes position,  $k$  denotes the localization point index, and  $N$  is the number of  
299 localization points. The average number of localization points of such filtered individual  
300 telomeres for TRF1, HP1 $\alpha$ , WT TRF1HP1 $\alpha$ , TRF1HP1 $\alpha$ l165A were 664, 420, 544, and 639,  
301 respectively (Supplementary Fig. 7). As an imaging quality control, we only analyzed telomere  
302 clusters with centers of mass near the focal plane, and consisting of more than 200 localization  
303 points (Fig. 6c, bottom panel). Telomeric localization points were clustered using Insight3  
304 software<sup>47</sup> to reconstruct structures of individual telomeric foci (Fig. 6c, top panel). Across all  
305 experimental groups, individual  $R_g$  values showed only weak correlations with number of  
306 localization points (Supplementary Fig. 7). Average  $R_g$  was similar in parental cells and Vonly,  
307 suggesting any observable changes in  $R_g$  are not caused by the vector itself (Supplementary  
308 Fig 8).

309  
310 Some generalities emerged from these analyses. As expected, most telomeres appeared

311 spherical, but heterogeneous shapes were also observed<sup>45</sup>. Fig. 6c shows examples of  
312 individual telomere structures across a gradient of Rg in TRF1HP1 $\alpha$ . Analyses showed  
313 telomeres with larger Rg displayed more variable and irregular shapes; specifically, while more  
314 spread out in three dimensions, they were compact (dense) in one dimension (Fig. 6c). The  
315 distributions of Rg heterogeneity among individual telomeres were consistently observed in  
316 multiple nuclei for each experimental group (Fig. 6d-g). This indicated that the observed  
317 structural differences among groups, as described below, are unlikely to have been simply  
318 skewed by specific nuclei that harbored Rg outliers.

319  
320 To compare among the groups, we quantified the differences in telomeric structures. Rg  
321 distribution frequency of individual telomeres were represented by violin plots (Fig. 6h).  
322 Surprisingly, the Rg mean of WT TRF1HP1 $\alpha$  (90.7 nm) was significantly higher than the mean  
323 Rgs of controls TRF1 (84 nm) and HP1 $\alpha$  (73.8 nm). The phenotype of the point mutant  
324 TRF1HP1 $\alpha$  I165A (Rg mean 83.6 nm) resembled that of the TRF1 control (84 nm). We also  
325 noted that the Rg mean of TRF1 alone versus HP1 $\alpha$  alone differed. Further studies are  
326 underway to better understand this phenomenon. We focused our analyses on the finding that  
327 the Rg mean of WT TRF1HP1 $\alpha$  was significantly higher than both controls (TRF1 or HP1 $\alpha$ ) or  
328 point mutant TRF1HP1 $\alpha$  I165A. To quantify the proportions of irregular telomere structures,  
329 mean Rg of TRF1 (84 nm) was applied as a reference cut-off (Fig. 6h, dashed line). Fractions of  
330 telomeres with Rg equal or greater than 84 nm were calculated (Fig. 6i). There was a higher  
331 fraction of irregularly-shaped telomeres in WT TRF1HP1 $\alpha$  (0.55) compared to TRF1 (0.44) or  
332 HP1 $\alpha$  (0.27), and mutation I165A reduced this back down to 0.43, similar to in TRF1 (0.44) (Fig.  
333 6i). Together, these data indicate that tethering WT HP1 $\alpha$  at telomeres results in increased  
334 irregularly-shaped telomeres.

335

336 **DISCUSSION**

337 The establishment of a dynamic telomeric chromatin is important for the structural and  
338 functional integrity of telomeres. However, how structural determinants impact telomere  
339 maintenance is largely unknown. We experimentally enhanced heterochromatinization at  
340 chromosomal ends by enriching HP1 $\alpha$  specifically at telomeres. The results reported here,  
341 summarized in Fig. 7, provide new insights into how heterochromatin alters telomere  
342 maintenance and structure. Using TRF1 for telomere-tethering of HP1 $\alpha$ , which is detected  
343 naturally at telomeres but at low occupancies<sup>14, 33-35</sup>, we report that an intact dimerization  
344 domain of HP1 $\alpha$ , with its ligand binding function, is required to regulate telomere extension.  
345 Thus, HP1 $\alpha$ -induced chromatin alteration can function as a gatekeeper of telomerase action.  
346 The requirement for ligand binding by HP1 $\alpha$  suggested that this function requires interaction  
347 with other factors. Moreover, employing independent modes of inducing telomere damage  
348 (mutant DNA repeat incorporation or shelterin TRF2 depletion), we found that the tethered  
349 HP1 $\alpha$  increases telomere protection. Future studies will be of interest to determine if the  
350 telomere-localized chromatin changes induced by HP1 $\alpha$  may also play an active role in the DNA  
351 damage responses themselves at the telomeres. Structurally, we found that enhancing  
352 heterochromatin by tethering HP1 $\alpha$  increases the irregularity of telomere shapes, dependent on  
353 an intact HP1 $\alpha$  dimerization domain. This correlation suggests the possibility that certain  
354 telomeric structural conformations facilitate ligand binding efficiency to result in inhibition of  
355 telomere extension by telomerase.

356

357 Previous reports, using *in vitro* nucleosome reconstitution assays<sup>3, 48</sup>, suggested TRF1 and  
358 TRF2 may play roles in both the formation and dynamics of telomeric nucleosomal arrays.  
359 Telomeric DNA, like other chromosomal DNA, wraps around histone protein cores, forming  
360 nucleosomes. We observed a slight decrease of the core histone protein H3 occupancy at  
361 telomeres by overexpressing just TRF1, and a further reduction upon enriching HP1 $\alpha$  at  
362 telomeres (Fig. 1). Decreased H3 at telomeres might reflect displacement of some nucleosomes

363 by the tethered TRF1HP1 $\alpha$ . This is consistent with the *in vitro* finding that telomere sequence  
364 disfavors nucleosome assembly<sup>5</sup>.  
365  
366 TRF2, like TRF1, also directly binds double-stranded telomeric DNA<sup>1,2</sup>. Interestingly however,  
367 our ChIP analysis found that TRF1HP1 $\alpha$  expression neither altered TRF2 occupancy (Fig. 1)  
368 nor elevated TIFs (Fig. 4d-f), suggesting TRF1HP1 $\alpha$  cohabited with shelterin. We speculate that  
369 TRF1HP1 $\alpha$  may directly interact with nucleosome-bound telomeric DNA in addition to  
370 nucleosomal-free telomeric DNA without interfering with TRF2 binding. This is consistent with  
371 previous reports, using micrococcal nuclease I mapping in mouse embryonic fibroblasts,  
372 showing no evident alteration of telomeric nucleosomal organization upon depletion of TRF2 or  
373 even the whole shelterin<sup>4,49</sup>. If a significant amount of bulk TRF2 had been out-competed by  
374 TRF1HP1 $\alpha$  for telomere binding, we would have expected a phenotype resembling that of  
375 overexpression of a dominant negative mutant (TRF2 $\Delta$ B $\Delta$ M)<sup>50</sup>, which was not observed. We  
376 cannot exclude that the balance of other shelterin components could be altered. These other  
377 components, including POT1, TIN2, RAP1 and TPP1, bind to single-stranded telomeric DNA  
378 and/or function as scaffold bridging proteins. Exactly how shelterins interplay with histones to  
379 regulate telomere dynamics are important topics for future studies.

380

381 Through these studies, we uncovered and dissected some specific functions of HP1 $\alpha$  at  
382 telomeres. Telomerase plays a crucial role in maintaining unlimited cellular proliferation in the  
383 majority of cancer cells. Telomerase activity is regulated at multiple levels including  
384 transcriptional regulation<sup>51,52</sup>, holoenzyme biogenesis<sup>53</sup>, trafficking and recruitment of  
385 telomerase to telomeres<sup>54</sup>. However, how local telomere chromatin dynamics regulate  
386 telomerase action and telomere length has been unclear. Our HP1 $\alpha$  mutational analyses  
387 suggest that the CSD region functions as a negative regulator of telomerase action. The CSD is  
388 required for HP1 $\alpha$  dimerization and interaction with proteins containing a conserved motif,

389 PXVXL<sup>55</sup>. Candidates for such ligands include shelterin component TIN2<sup>56</sup>, and the telomere-  
390 associated chromatin remodeler ATRX<sup>57</sup>, which both contain PXVXL motifs. We speculate that  
391 their recruitment by HP1 $\alpha$  (directly or via another bridging complex) may impact telomerase  
392 action, potentially through regulating telomerase recruitment to the telomere<sup>58, 59</sup>, polymerization  
393 initiation and/or processivity<sup>60</sup>.

394

395 A main function of the CD region for HP1 $\alpha$  is to recognize H3K9me2/3<sup>31</sup>. While WT TRF1HP1 $\alpha$   
396 enriched HP1 $\alpha$  at telomeres, as expected some HP1 $\alpha$  also localized to various other genome  
397 regions, presumably harboring the recognition heterochromatin marks (Fig. 3a-c). V22M mutant  
398 lacks the ability to bind to heterochromatin marks at non-telomeric genomic regions, and was  
399 exclusively tethered by TRF1 at the telomeres, and not to other regions in the genome (Fig. 3b-  
400 d). Therefore, to exclude potential confounding effects mediated via augmented binding to such  
401 regions, we exploited mutant V22M intentionally as a control, both to eliminate any tethering by  
402 TRF1HP1 $\alpha$  of TRF1 at non-telomeric sites, and to prevent indirect effects caused by TRF1HP1 $\alpha$   
403 bound to genomic regions. Telomere-tethered HP1 $\alpha$ -directed inhibition of telomere extension  
404 was independent of H3K9me2/3 recognition by the CD. Hence, H3K9m2/3 anchoring is  
405 separable from inhibition of telomere extension.

406

407 Here we have reported new connections between telomere structure, protection and telomerase  
408 action (Table 1 and Fig. 7). Overexpression of TRF1HP1 $\alpha$  increased heterochromatin mark  
409 H3K9me3 on telomeres, increased telomere protection, reduced telomerase action and  
410 surprisingly induced irregular, often visually extended, telomeric structures. Previous reports  
411 also have suggested that silent chromatin that was less condensed than euchromatin since  
412 subtelomeric and pericentromeric heterochromatin regions had lower protection in micrococcal  
413 nuclease assays compared to the rest of the genome<sup>61</sup>. Despite the prevailing assumption that  
414 highly condensed chromatin conformation is transcriptionally inert, transcription factors were



415 found to bind to heterochromatic repeat sequences across diverse species<sup>62, 63</sup>. Telomeres,  
416 while thought to be more heterochromatic than other genomic regions, are transcribed into  
417 telomere repeat-containing RNA (TERRA)<sup>16</sup> which interacts with TRF1 and TRF2 to regulate  
418 telomere length<sup>64</sup>. Although molecular component changes at telomeres can trigger a switch  
419 from a protected to a deprotected state<sup>65</sup>, our observed increased irregularity of telomere  
420 shapes occur in the absence of DNA damage responses. We propose that these changes in  
421 telomere structures can influence protection and telomerase action. It is also possible that the  
422 reduced H3 at telomeres (Fig. 1) may influence nucleosome arrangements to result in a more  
423 irregular telomere structure.

424

425 Telomere maintenance is crucial for cancer cell proliferation. Telomere homeostasis is regulated  
426 at many different levels. Telomere chromatin encompasses highly dynamic structures  
427 interconverting between different conformations. Thus, telomere chromatin states may add  
428 another layer of protection to play an important role in regulating chromosome end maintenance  
429 and protection. Chromatin states are often altered during tumorigenesis. It has become clear  
430 that, along with genomic instability, epigenetic abnormalities promote carcinogenesis.  
431 Heterochromatin-dependent, non-canonical telomere protection strategies, resembling those  
432 found in flies or yeasts, may have been selected for in some human cancers. The possibility that  
433 some cancers can adapt heterochromatin changes to stabilize their telomeres will be interesting  
434 topics for future studies. Manipulating the epigenetic status at telomeres should provide new  
435 insights for the development of innovative telomere-directed, epigenetic cancer therapeutics.

436

## 437 **METHODS**

### 438 **Cell culture**

439 UM-UC3 (ATCC), U2OS (ATCC), BJ (ATCC), WI-38 (ATCC) and lenti-X-293T (Clontech) cells  
440 were cultured at 37°C in 5% CO<sub>2</sub> in high glucose DMEM medium (Hyclone, Logan, UT)

441 containing 10% Fetal Bovine Serum (Hyclone, Logan, UT) and 1% (vol/vol) penicillin–  
442 streptomycin (Gibco). Co-transfection was performed using PolyJet reagent (SignaGen  
443 Laboratories).

#### 444 **Plasmids and lentivirus**

445 The pHR' lentiviral plasmids were generated using the second-generation lentiviral system  
446 provided by Dr. Didier Trono. HP1 $\alpha$  was a gift from Dr. Tom Misteli (Addgene plasmid #  
447 17652)<sup>66</sup>. N-terminal EGFP-tagged TRF1, HP1 $\alpha$ , WT TRF1HP1 $\alpha$  or mutants TRF1HP1 $\alpha$  were  
448 subcloned into pHR' respectively with HP1 $\alpha$  (WT or various mutants) located on the C-terminus  
449 and TRF1 in between EGFP and HP1 $\alpha$ . HP1 $\alpha$  mutants were gifts from Dr. Geeta Narlikar<sup>36</sup>.  
450 Plasmids were driven by the CMV promoter followed by an internal ribosome entry site and a  
451 blasticidin resistance gene. pHR' mCherry-TRF2 expression lentiviral vector contained a  
452 hygromycin resistance gene. hTR expression lentiviral vectors driven by the IU1 promoter and a  
453 puromycin resistance gene driven by the CMV promoter<sup>42, 43</sup>. WT and mutant hTR template  
454 sequences were as follows: WT – 3'-CAAUCCCAAUC-5'; 47A – 3'-CAAACCCAAAC-5' and  
455 TSQ1 – 3'-CCAACGCCAAC-5'. SgRNA targeting telomere (5'-  
456 caccgGTTAGGGTTAGGGTTAGGGTTA) or Gal4 (5'-caccgGAACGACTAGTTAGGCGTGTA)  
457 sequences were cloned into LentiCRISPRv2, a gift from Feng Zhang (Addgene Plasmid  
458 #52961)<sup>67</sup>. Lentivirus was packaged in lenti-X-293T (Clontech) using PolyJet reagent (SignaGen  
459 Laboratories). Drug selection was initiated 48h post infection with 50  $\mu$ g/ml blasticidin for 5 days  
460 (ThermoFisher Scientific). For introduction of a second round of infection with either WT or  
461 mutant hTRs, cells were selected using 8  $\mu$ g/ml puromycin for 1 day (ThermoFisher Scientific).

462

#### 463 **Western blotting**

464 Cells were lysed [10 mM Tris-HCl pH 7.4, 150 mM NaCl, 0.5% IGEPAL CA-630, 10% glycerol, 1  
465 mM EDTA, 1X Halt protease inhibitor cocktail (Thermofisher Scientific), 1 mM DTT,

466 Benzonase nuclease 50 U/ml (Novagen)]. Lysate was spun at 13,000 rpm (15 min at 4°C).  
467 Supernatant was heated at 95°C for 5 min. Protein concentration was measured using Precision  
468 Red protein assay reagent (Cytoskeleton, Inc.). ~40 µg lysates were separated by SDS-PAGE  
469 and transferred onto the Immobilon P PVDF membrane (EMD Millipore). The blots were then  
470 blocked for 30 min at room temperature in 5% milk in TBST (20 mM Tris pH7.4, 150 mM NaCl,  
471 0.05% Tween 20) and incubated for 1h each at room temperature with primary antibodies  
472 followed by secondary horseradish peroxidase-conjugated antibodies. After washing, the blots  
473 were treated with chemiluminescent reagents (SuperSignal West Pico kit, Thermo Fisher) and  
474 exposed to films. Primary antibodies used include 1:5000 rabbit anti-GFP (A11122; Invitrogen);  
475 1:1000 rabbit anti-TRF1 (ab1423; Abcam); 1:2000 goat anti-HP1α (ab77256; Abcam); 1:2000  
476 goat anti-TRF2 (NB110-57130), 1:1000 mouse anti-Cas9 (A-9000; Epigentek), 1:200 mouse  
477 anti-p53 (sc-126; Santa Cruz), and 1:1000 mouse anti-GAPDH (MA515738; ThermoFisher).  
478 Secondary antibodies used include 1:5000 Goat Anti-Mouse IgG-HRP (115-035-166; Jackson  
479 ImmunoResearch), 1:5000 Goat Anti-Rabbit IgG-HRP (111-035-144; Jackson  
480 ImmunoResearch), 1:5000 Donkey Anti-Goat IgG-HRP (sc2020; Santa Cruz Biotechnology).  
481 Uncropped blots were shown in Supplementary Fig. 9.

482

### 483 **Chromatin immunoprecipitation and dot blot assays**

484 20 x 10<sup>6</sup> cells were trypsinized and crosslinked with 1% paraformaldehyde (w/v)  
485 (ThermoFisher Scientific) at room temperature for 5 min, followed by 125 mM glycine (Sigma)  
486 for 5 min to quench the crosslinking and washed (cold 1XPBS, 1 mM PMSF). All subsequent  
487 steps were performed at 4°C, unless noted otherwise. Cells were resuspended into ChIP  
488 lysis buffer [0.5% NP-40, 85 mM KCl, 20 mM Tris-HCl pH8.0 with 1X Halt protease inhibitor  
489 cocktail (ThermoFisher Scientific)] for 15 min, homogenized with a pellet pestle  
490 (ThermoFisher Scientific), and spun at 450 x g for 5 min. Nuclei pellets were incubated in  
491 nuclear lysis buffer (1% SDS, 50 mM Tris-HCl pH8.0, 10 mM EDTA with 1X Halt protease

492 inhibitor cocktail) for 30 min, further lysed with a syringe, and sonicated with Covaris S2 to  
493 obtain fragments between 400 and 1,000 base pairs. Fragment sizes were checked by  
494 running an aliquot of the sheared, purified chromatin on an agarose gel. Sheared chromatin  
495 was spun at 13,000 rpm for 10 min, and supernatant ( $2 \times 10^6$  cells/reaction) was incubated  
496 overnight with 10  $\mu\text{g}$  of ChIP-grade antibodies respectively: anti-H3 (ab1791; Abcam); anti-  
497 HP1 $\alpha$  (ab77256; Abcam); anti-H3K9me3 (ab8898; Abcam), anti-TRF2 (NB110-57130; Novus  
498 Biologicals); anti-TRF1 (ab1423; Abcam) and anti-rabbit IgG (#2729; Cell Signaling). Samples  
499 were then immunoprecipitated with Dynabeads Protein G (Life Technologies) for > 6h to  
500 overnight, washed and eluted (1XTE, 1% SDS, 250 mM NaCl). Immunoprecipitated chromatin  
501 was treated with 0.2  $\mu\text{g}/\mu\text{l}$  RNase at 37°C for 30 min, followed by reverse crosslinking [0.2  $\mu\text{g}/\mu\text{l}$   
502 Proteinase K (Biolone) and 200 mM NaCl] at 65°C for >6h to overnight. DNA was purified using  
503 NucleoSpin Gel and PCR cleanup kit (Macherey-Nagel), denatured (0.1 M NaOH) at 37°C for  
504 30 min, neutralized (6XSSC), and transferred to a Hybond-N+ membrane (Amersham) on a dot  
505 blot.

506 24 nt C-strand telomeric probes containing six  $^{32}\text{P}$ -dC were synthesized<sup>68</sup>. 1  $\mu\text{l}$  annealed  
507 template C-rich oligo (1.7 pmol/ $\mu\text{l}$ ), 1  $\mu\text{l}$  of dTTP (1.25 mM stock, final 50  $\mu\text{M}$ ), 7  $\mu\text{l}$   $^{32}\text{P}$ -dCTP  
508 (3000 Ci/mmol), 4  $\mu\text{l}$   $^{32}\text{P}$ -dATP (3000 Ci/mmol), 7.9  $\mu\text{l}$  Millipore H<sub>2</sub>O, and 1  $\mu\text{l}$  Klenow (5 U/ $\mu\text{l}$ )  
509 were combined in a final volume of 25  $\mu\text{l}$ . Room temperature extension was carried out for 30  
510 min, and 95°C for 5 min (to inactivate Klenow to prevent probe degradation upon UDG  
511 treatment). The reaction was cooled to room temperature. 0.5  $\mu\text{l}$  uracil deglycosylase (UDG) (1  
512 U/ $\mu\text{l}$ ) was added to degrade the GTU template, incubated at 37°C for 15 min, and then UDG  
513 was inactivated at 95°C for 10 min. Free isotopes were removed using an illustra microspin G-  
514 25 column (GE Healthcare, Piscataway, NJ). CENPB (5-CTTCGTTGGAAACGGGA) probes  
515 were end-labeled with [ $\gamma$ - $^{32}\text{P}$ ] ATP. Half of the blot was hybridized with C-strand telomeric  
516 probes, and the other half with CENPB probe at 42°C overnight. The blots were then washed  
517 and exposed to a Phosphorimager screen (GE Healthcare). Uncropped dot blots were shown

518 in Supplementary Fig. 1.

519

520

### 521 **Telomere restriction fragment length analysis**

522 Genomic DNA was purified using DNeasy Blood & Tissue kit (Qiagen, Valencia, CA). Telomere

523 Restriction Fragment (TRF) length analysis was performed<sup>69</sup>. 1 µg purified genomic DNA was

524 digested in 20 µl reaction with Alu, MspI, HaeIII, HinfI, HhaI and RsaI for 4h at 37°C. DNA was

525 separated on a 0.8% agarose gel in 0.5X TBE. The gel was dried, denatured (0.5 M NaOH and

526 1.5 M NaCl for 1h), rinsed with distilled water (3x), neutralized (0.5 M Tris-HCl pH8 and 1.5M

527 NaCl for 30 min), prehybridized (6x SSC, 5x Denhardt's solution, 0.5% (w/v) SDS), and

528 hybridized with C-strand telomeric probe at 42°C overnight. The gel was then washed and

529 exposed to a Phosphorimager screen (GE Healthcare). Average overhang sizes were

530 calculated using the formula mean average length =  $\sum(\text{Int}_i) / \sum(\text{Int}_i / \text{MW}_i)$ , where  $\text{Int}_i$  = signal

531 intensity and  $\text{MW}_i$  = molecular weight of the DNA at position  $i$ <sup>69</sup>.

532

533 DNA in Supplementary Fig 6a and 6i were digested with RsaI and HinfI. Generally size markers

534 were loaded on TRF gels. However, the DNAs in Supplementary Fig 6a and 6i were only run for

535 a very short time so that the telomeres would remain as compact as possible to maximize the

536 ability to detect remaining telomere resulting from Cas9-digestion. As size markers would not

537 have been able to be resolved during this short run, they were eliminated in this in-gel

538 hybridization. Here we focused on quantifying telomeric intensity using [ $\gamma$ -<sup>32</sup>P] end-labeled Alu

539 probe (CAC GCC TGT AAT CCC AGC ACT TTG) as loading controls. Gels were denatured

540 and neutralized between C-strand telomere probe and Alu probe hybridization. Uncropped gels

541 were shown in Supplementary Fig. 10.

542

### 543 **Beta-galactosidase assay**

544 Senescence associated **beta-galactosidase** ( $\beta$ -gal) was analyzed using colorimetric  $\beta$ -gal  
545 staining kit (Cell Signaling) or quantified by fluorometric kit (Cell Biolabs). Total protein was  
546 measured using Precision Red protein assay reagent (Cytoskeleton, Inc.).

547

#### 548 **Cell growth assays**

549 Puromycin-selected cells were infected with either WT or mutant hTRs at day 0, and selected  
550 with puromycin at day 2. Cells were split as needed to maintain logarithmic growth, and  
551 harvested at indicated time points and stained with trypan blue. Viable cells were scored by  
552 TC20 automatic cell counter (Biorad).

553

#### 554 **Telomere dysfunction-induced foci (TIF) image analysis**

555 Cells were washed with 1X PBS, fixed with 4% paraformaldehyde (w/v) (ThermoFisher) in  
556 1XPBS and permeabilized with 0.5% NP-40 for 15 min. IF/FISH<sup>42</sup> was performed with  
557 modifications. For IF, cells were blocked [0.2% (w/v) fish gelatin, 0.5% (w/v) BSA in PBS for 20  
558 min], and immunostained with the primary antibody pAb anti-53BP1 (NB100-304; Novus  
559 Biologicals) 1:500 for 1 h. Cells were then washed and incubated with secondary antibody Alexa  
560 Fluor 488 (Molecular Probes) 1:750 for 1 h, fixed with 2% paraformaldehyde and incubated with  
561 0.1 mg/ml RNase for 1 h at 37°C. For, FISH, cells were dehydrated sequentially with ethanol  
562 (70%, 95% and 100%; 5 min each), heated in hybridization mix with 0.5 mg/ml peptide nucleic  
563 acid (PNA) telomeric probe TelC-Cy3 (PNABio) at 85°C for 10 min to denature the DNA,  
564 followed by overnight hybridization at room temperature. Nuclei were stained with DAPI (4,6-  
565 diamidino-2-phenylindole) (Life Technologies) and mounted with Prolong Gold (Invitrogen).

566

567 Equipment and settings: Images were captured using a DeltaVision Real-time Deconvolution  
568 Microscope (Applied Precision) with a 100X 1.4 NA Plan Apo objective (Olympus) by a

569 Photometrics CoolSNAP HQ monochrome CCD camera. 0.25  $\mu\text{m}$  increments (X20 stacks for a  
570 total of 5  $\mu\text{m}$ ) were deconvoluted and Z-projected in SoftWoRx (Applied Precision).

571

572 TIFs colocalization analysis: Z-Projected images were converted to Tagged Image File Format  
573 (TIFF) using the Fiji image processing package ([www.fiji.sc](http://www.fiji.sc)). Enumeration of 53BP1 and  
574 telomeric foci were quantified using CellProfiler 2.1.1. ([www.cellprofiler.org](http://www.cellprofiler.org)) image analysis  
575 software. For foci scoring, identical thresholds were applied to all controls and experimental  
576 groups, followed by colocalization (TIFs) masking (pipelines available on request).

577

### 578 **TRF2 knockdown**

579 Cells were transfected with ON-target plus smart pool consisting TRF2 (siRNA) or si-non-  
580 targeting (Dharmacon) using Lipofectamine RNAiMAX reagent (Life Technologies) following  
581 manufacture protocols, and analyzed at ~72hrs.

582

### 583 **STORM image acquisition and analysis**

584 STORM equipment and settings: STORM<sup>70</sup> was performed on a custom-built microscope based  
585 on a Nikon Ti-U inverted microscope. Three activation imaging lasers (Coherent CUBE 405,  
586 OBIS 561 and CUBE 642) were combined using dichroic mirrors, aligned, expanded and  
587 focused to the back focal plane of the objective (Nikon Plan Apo 100x oil NA 1.45). The lasers  
588 were controlled directly by the computer. A quad band dichroic mirror (zt405/488/561/640rpc,  
589 Chroma) and a band-pass filter (ET705/70m, Chroma) separated the fluorescence emission  
590 from the excitation light. During image acquisition, the focusing of the sample was stabilized by  
591 a closed-loop system that monitored the back reflection from the sample coverglass an infra-red  
592 laser beam sent through the edge of the microscope objective.

593

594 A low-end piezoelectric deformable mirror (DM) (DMP40-P01, Thorlabs) was added in the

595 emission path at the conjugate plane of the objective pupil plane<sup>70</sup>. By first flattening the mirror  
596 and then manually adjusting key Zernike polynomials, this DM corrected aberrations induced by  
597 both the optical system and the glass-water refractive index mismatch when the sample is  
598 several micrometers away from the coverglass. After correcting these aberrations, an astigmatic  
599 aberration was further added by the DM for 3D STORM. The fluorescence was recorded at a  
600 frame rate of 57 Hz on an electron multiplying CCD camera (Ixon+ DU897E-CS0-BV, Andor).  
601 The mounting medium used for STORM imaging is PBS with the addition of 100 mM  
602 mercaptoethylamine at pH 8.5, 5% glucose (w/v) and oxygen scavenging enzymes (0.5 mg/ml  
603 glucose oxidase (Sigma-Aldrich), and 40 mg/ml catalase (Roche Applied Science). The buffer  
604 remains suitable for imaging for one to two hours. Photo-switchable dye Cy5 was used for  
605 imaging with a ratio of one dye per PNA probe. Cy5 was excited with a 642 nm imaging laser,  
606 with a typical power at the back port of the microscope being 30 mW. Analysis of STORM raw  
607 data was performed in the Insight3 software<sup>47</sup>, which identifies and fits single molecule spots in  
608 each camera frame to determine their x, y and z coordinates as well as photon numbers.  
609 Sample drift during data acquisition were corrected using imaging correlation analysis. The drift-  
610 corrected coordinates, photon number and the frame of appearance of each identified molecule  
611 was saved in a molecule list for further analysis.

612

613 STORM imaging: Cells were labeled with PNA telomeric probe, TelC-Cy5 (PNABio). Individual  
614 telomeric localization signals were detected by switching the fluorophores between active and  
615 dark states stochastically. Accumulation of individual fluorophore forms a cluster of molecular  
616 positions, known as localizations, corresponding to structural characteristics of an individual  
617 telomere.

618

619 STORM analysis: Individual telomeres were manually selected from the STORM images. The  
620 telomeres near focal planes with good resolution were picked. These manually picked telomeres



621 were further screened so that telomeres with more than 200 localizations were kept for the  
622 Radius of gyration (Rg) analysis.

623

### 624 **Statistical analyses**

625 Significance of mean was assessed by statistical analyses noted in the corresponding figure  
626 legends. These include: one-way ANOVA and Dunnett's multiple comparison test with 95%  
627 confidence level; two-tailed unpaired *t*-test with 95% confidence level. All graph bars are  
628 represented by means with standard error of the mean (s.e.m.). For STORM statistical  
629 analysis, means of Rg in the violin plots are compared using ANOVA Turkey's multiple  
630 comparisons with 95% confidence level.

631

### 632 **Data availability**

633 All relevant data and supplementary information files are included in this published article. All  
634 other supporting information is available from the authors upon reasonable request.

635

### 636 **Code availability**

637 Custom image analysis for Rg calculation were written in MATLAB 2012B. The MATLAB script  
638 is available from the authors upon request.

639

### 640 **REFERENCES**

- 641 1. Blackburn, E.H., Greider, C.W. & Szostak, J.W. Telomeres and telomerase: the path  
642 from maize, Tetrahymena and yeast to human cancer and aging. *Nat Med* **12**, 1133-  
643 1138 (2006).
- 644 2. Palm, W. & de Lange, T. How shelterin protects mammalian telomeres. *Annu Rev Genet*  
645 **42**, 301-334 (2008).
- 646 3. Pisano, S. *et al.* Telomeric nucleosomes are intrinsically mobile. *J Mol Biol* **369**, 1153-  
647 1162 (2007).
- 648 4. Wu, P. & de Lange, T. No overt nucleosome eviction at deprotected telomeres. *Mol Cell*  
649 *Biol* **28**, 5724-5735 (2008).
- 650 5. Galati, A., Micheli, E. & Cacchione, S. Chromatin structure in telomere dynamics. *Front*  
651 *Oncol* **3**, 46 (2013).

- 652 6. Apte, M.S. & Cooper, J.P. Life and cancer without telomerase: ALT and other strategies  
653 for making sure ends (don't) meet. *Crit Rev Biochem Mol Biol* **52**, 57-73 (2017).
- 654 7. Lundblad, V. & Blackburn, E.H. An alternative pathway for yeast telomere maintenance  
655 rescues est1- senescence. *Cell* **73**, 347-360 (1993).
- 656 8. Jain, D., Hebden, A.K., Nakamura, T.M., Miller, K.M. & Cooper, J.P. HAATI survivors  
657 replace canonical telomeres with blocks of generic heterochromatin. *Nature* **467**, 223-  
658 227 (2010).
- 659 9. Fanti, L., Giovinazzo, G., Berloco, M. & Pimpinelli, S. The heterochromatin protein 1  
660 prevents telomere fusions in Drosophila. *Mol Cell* **2**, 527-538 (1998).
- 661 10. Garcia-Cao, M., O'Sullivan, R., Peters, A.H., Jenuwein, T. & Blasco, M.A. Epigenetic  
662 regulation of telomere length in mammalian cells by the Suv39h1 and Suv39h2 histone  
663 methyltransferases. *Nat Genet* **36**, 94-99 (2004).
- 664 11. Rosenfeld, J.A. *et al.* Determination of enriched histone modifications in non-genic  
665 portions of the human genome. *BMC Genomics* **10**, 143 (2009).
- 666 12. Vaquero-Sedas, M.I., Gamez-Arjona, F.M. & Vega-Palas, M.A. Arabidopsis thaliana  
667 telomeres exhibit euchromatic features. *Nucleic Acids Res* **39**, 2007-2017 (2011).
- 668 13. Vaquero-Sedas, M.I., Luo, C. & Vega-Palas, M.A. Analysis of the epigenetic status of  
669 telomeres by using ChIP-seq data. *Nucleic Acids Res* **40**, e163 (2012).
- 670 14. Cubiles, M.D. *et al.* Epigenetic features of human telomeres. *Nucleic Acids Res* **46**,  
671 2347-2355 (2018).
- 672 15. Tennen, R.I., Bua, D.J., Wright, W.E. & Chua, K.F. SIRT6 is required for maintenance of  
673 telomere position effect in human cells. *Nat Commun* **2**, 433 (2011).
- 674 16. Azzalin, C.M., Reichenbach, P., Khoraiuli, L., Giulotto, E. & Lingner, J. Telomeric repeat  
675 containing RNA and RNA surveillance factors at mammalian chromosome ends.  
676 *Science* **318**, 798-801 (2007).
- 677 17. Gonzalo, S. *et al.* DNA methyltransferases control telomere length and telomere  
678 recombination in mammalian cells. *Nat Cell Biol* **8**, 416-424 (2006).
- 679 18. Jung, A.R. *et al.* Increased alternative lengthening of telomere phenotypes of  
680 telomerase-negative immortal cells upon trichostatin--a treatment. *Anticancer Res* **33**,  
681 821-829 (2013).
- 682 19. Wong, L.H. *et al.* Histone H3.3 incorporation provides a unique and functionally essential  
683 telomeric chromatin in embryonic stem cells. *Genome Res* **19**, 404-414 (2009).
- 684 20. Marion, R.M. *et al.* Telomeres acquire embryonic stem cell characteristics in induced  
685 pluripotent stem cells. *Cell Stem Cell* **4**, 141-154 (2009).
- 686 21. Gonzalo, S. *et al.* Role of the RB1 family in stabilizing histone methylation at constitutive  
687 heterochromatin. *Nat Cell Biol* **7**, 420-428 (2005).
- 688 22. Park, J.H., Cosgrove, M.S., Youngman, E., Wolberger, C. & Boeke, J.D. A core  
689 nucleosome surface crucial for transcriptional silencing. *Nat Genet* **32**, 273-279 (2002).
- 690 23. Jones, B. *et al.* The histone H3K79 methyltransferase Dot1L is essential for mammalian  
691 development and heterochromatin structure. *PLoS Genet* **4**, e1000190 (2008).
- 692 24. Heaphy, C.M. *et al.* Altered telomeres in tumors with ATRX and DAXX mutations.  
693 *Science* **333**, 425 (2011).
- 694 25. Udugama, M. *et al.* Histone variant H3.3 provides the heterochromatic H3 lysine 9 tri-  
695 methylation mark at telomeres. *Nucleic Acids Res* **43**, 10227-10237 (2015).
- 696 26. Gottschling, D.E., Aparicio, O.M., Billington, B.L. & Zakian, V.A. Position effect at S.  
697 cerevisiae telomeres: reversible repression of Pol II transcription. *Cell* **63**, 751-762  
698 (1990).
- 699 27. Palacios, J.A. *et al.* SIRT1 contributes to telomere maintenance and augments global  
700 homologous recombination. *J Cell Biol* **191**, 1299-1313 (2010).
- 701 28. Michishita, E. *et al.* SIRT6 is a histone H3 lysine 9 deacetylase that modulates telomeric  
702 chromatin. *Nature* **452**, 492-496 (2008).

- 703 29. Lovejoy, C.A. *et al.* Loss of ATRX, genome instability, and an altered DNA damage  
704 response are hallmarks of the alternative lengthening of telomeres pathway. *PLoS*  
705 *Genet* **8**, e1002772 (2012).
- 706 30. Blasco, M.A. The epigenetic regulation of mammalian telomeres. *Nature reviews.*  
707 *Genetics* **8**, 299-309 (2007).
- 708 31. Canzio, D., Larson, A. & Narlikar, G.J. Mechanisms of functional promiscuity by HP1  
709 proteins. *Trends Cell Biol* **24**, 377-386 (2014).
- 710 32. Arnoult, N., Van Beneden, A. & Decottignies, A. Telomere length regulates TERRA  
711 levels through increased trimethylation of telomeric H3K9 and HP1alpha. *Nat Struct Mol*  
712 *Biol* **19**, 948-956 (2012).
- 713 33. Minc, E., Allory, Y., Worman, H.J., Courvalin, J.C. & Buendia, B. Localization and  
714 phosphorylation of HP1 proteins during the cell cycle in mammalian cells. *Chromosoma*  
715 **108**, 220-234 (1999).
- 716 34. O'Sullivan, R.J., Kubicek, S., Schreiber, S.L. & Karlseder, J. Reduced histone  
717 biosynthesis and chromatin changes arising from a damage signal at telomeres. *Nat*  
718 *Struct Mol Biol* **17**, 1218-1225 (2010).
- 719 35. Sharma, G.G. *et al.* Human heterochromatin protein 1 isoforms HP1(Hsalpha) and  
720 HP1(Hsbeta) interfere with hTERT-telomere interactions and correlate with changes in  
721 cell growth and response to ionizing radiation. *Mol Cell Biol* **23**, 8363-8376 (2003).
- 722 36. Larson, A.G. *et al.* Liquid droplet formation by HP1alpha suggests a role for phase  
723 separation in heterochromatin. *Nature* **547**, 236-240 (2017).
- 724 37. Smogorzewska, A. *et al.* Control of human telomere length by TRF1 and TRF2. *Mol Cell*  
725 *Biol* **20**, 1659-1668 (2000).
- 726 38. Stohr, B.A. & Blackburn, E.H. ATM mediates cytotoxicity of a mutant telomerase RNA in  
727 human cancer cells. *Cancer research* **68**, 5309-5317 (2008).
- 728 39. Nozawa, R.S. *et al.* Human POGZ modulates dissociation of HP1alpha from mitotic  
729 chromosome arms through Aurora B activation. *Nat Cell Biol* **12**, 719-727 (2010).
- 730 40. Hiragami-Hamada, K. *et al.* N-terminal phosphorylation of HP1{alpha} promotes its  
731 chromatin binding. *Mol Cell Biol* **31**, 1186-1200 (2011).
- 732 41. Hayashihara, K. *et al.* The middle region of an HP1-binding protein, HP1-BP74,  
733 associates with linker DNA at the entry/exit site of nucleosomal DNA. *J Biol Chem* **285**,  
734 6498-6507 (2010).
- 735 42. Stohr, B.A., Xu, L. & Blackburn, E.H. The terminal telomeric DNA sequence determines  
736 the mechanism of dysfunctional telomere fusion. *Mol Cell* **39**, 307-314 (2010).
- 737 43. Diolaiti, M.E., Cimini, B.A., Kageyama, R., Charles, F.A. & Stohr, B.A. In situ  
738 visualization of telomere elongation patterns in human cells. *Nucleic Acids Res* **41**, e176  
739 (2013).
- 740 44. Timashev, L.A., Babcock, H., Zhuang, X. & de Lange, T. The DDR at telomeres lacking  
741 intact shelterin does not require substantial chromatin decompaction. *Genes Dev* **31**,  
742 578-589 (2017).
- 743 45. Vancevska, A., Douglass, K.M., Pfeiffer, V., Manley, S. & Lingner, J. The telomeric DNA  
744 damage response occurs in the absence of chromatin decompaction. *Genes Dev* **31**,  
745 567-577 (2017).
- 746 46. Bandaria, J.N., Qin, P., Berk, V., Chu, S. & Yildiz, A. Shelterin Protects Chromosome  
747 Ends by Compacting Telomeric Chromatin. *Cell* **164**, 735-746 (2016).
- 748 47. Huang, B., Jones, S.A., Brandenburg, B. & Zhuang, X. Whole-cell 3D STORM reveals  
749 interactions between cellular structures with nanometer-scale resolution. *Nat Methods* **5**,  
750 1047-1052 (2008).
- 751 48. Pisano, S. *et al.* The human telomeric protein hTRF1 induces telomere-specific  
752 nucleosome mobility. *Nucleic Acids Res* **38**, 2247-2255 (2010).

- 753 49. Sfeir, A. & de Lange, T. Removal of shelterin reveals the telomere end-protection  
754 problem. *Science* **336**, 593-597 (2012).
- 755 50. Galati, A. *et al.* TRF2 controls telomeric nucleosome organization in a cell cycle phase-  
756 dependent manner. *PLoS One* **7**, e34386 (2012).
- 757 51. Remke, M. *et al.* TERT promoter mutations are highly recurrent in SHH subgroup  
758 medulloblastoma. *Acta neuropathologica* **126**, 917-929 (2013).
- 759 52. Koelsche, C. *et al.* Distribution of TERT promoter mutations in pediatric and adult tumors  
760 of the nervous system. *Acta neuropathologica* **126**, 907-915 (2013).
- 761 53. Forsythe, H.L., Jarvis, J.L., Turner, J.W., Elmore, L.W. & Holt, S.E. Stable association of  
762 hsp90 and p23, but Not hsp70, with active human telomerase. *J Biol Chem* **276**, 15571-  
763 15574 (2001).
- 764 54. Venteicher, A.S. *et al.* A human telomerase holoenzyme protein required for Cajal body  
765 localization and telomere synthesis. *Science* **323**, 644-648 (2009).
- 766 55. Brasher, S.V. *et al.* The structure of mouse HP1 suggests a unique mode of single  
767 peptide recognition by the shadow chromo domain dimer. *EMBO J* **19**, 1587-1597  
768 (2000).
- 769 56. Canudas, S. *et al.* A role for heterochromatin protein 1gamma at human telomeres.  
770 *Genes Dev* **25**, 1807-1819 (2011).
- 771 57. Lechner, M.S., Schultz, D.C., Negorev, D., Maul, G.G. & Rauscher, F.J., 3rd The  
772 mammalian heterochromatin protein 1 binds diverse nuclear proteins through a common  
773 motif that targets the chromoshadow domain. *Biochem Biophys Res Commun* **331**, 929-  
774 937 (2005).
- 775 58. Schmidt, J.C., Zaug, A.J. & Cech, T.R. Live Cell Imaging Reveals the Dynamics of  
776 Telomerase Recruitment to Telomeres. *Cell* **166**, 1188-1197 e1189 (2016).
- 777 59. Abreu, E. *et al.* TIN2-tethered TPP1 recruits human telomerase to telomeres in vivo. *Mol*  
778 *Cell Biol* **30**, 2971-2982 (2010).
- 779 60. Zhao, Y. *et al.* Processive and distributive extension of human telomeres by telomerase  
780 under homeostatic and nonequilibrium conditions. *Mol Cell* **42**, 297-307 (2011).
- 781 61. Matsuda, A. *et al.* Highly condensed chromatins are formed adjacent to subtelomeric  
782 and decondensed silent chromatin in fission yeast. *Nat Commun* **6**, 7753 (2015).
- 783 62. Lantermann, A.B. *et al.* Schizosaccharomyces pombe genome-wide nucleosome  
784 mapping reveals positioning mechanisms distinct from those of Saccharomyces  
785 cerevisiae. *Nat Struct Mol Biol* **17**, 251-257 (2010).
- 786 63. Saksouk, N., Simboeck, E. & Dejardin, J. Constitutive heterochromatin formation and  
787 transcription in mammals. *Epigenetics Chromatin* **8**, 3 (2015).
- 788 64. Deng, Z., Norseen, J., Wiedmer, A., Riethman, H. & Lieberman, P.M. TERRA RNA  
789 binding to TRF2 facilitates heterochromatin formation and ORC recruitment at  
790 telomeres. *Mol Cell* **35**, 403-413 (2009).
- 791 65. Cesare, A.J. & Karlseder, J. A three-state model of telomere control over human  
792 proliferative boundaries. *Curr Opin Cell Biol* **24**, 731-738 (2012).
- 793 66. Cheutin, T. *et al.* Maintenance of stable heterochromatin domains by dynamic HP1  
794 binding. *Science* **299**, 721-725 (2003).
- 795 67. Sanjana, N.E., Shalem, O. & Zhang, F. Improved vectors and genome-wide libraries for  
796 CRISPR screening. *Nat Methods* **11**, 783-784 (2014).
- 797 68. Herbert, B.S., Shay, J.W. & Wright, W.E. Analysis of telomeres and telomerase. *Curr*  
798 *Protoc Cell Biol* **Chapter 18**, Unit 18 16 (2003).
- 799 69. Chow, T.T., Zhao, Y., Mak, S.S., Shay, J.W. & Wright, W.E. Early and late steps in  
800 telomere overhang processing in normal human cells: the position of the final RNA  
801 primer drives telomere shortening. *Genes Dev* **26**, 1167-1178 (2012).
- 802 70. Shi, X. *et al.* Super-resolution microscopy reveals that disruption of ciliary transition-zone  
803 architecture causes Joubert syndrome. *Nat Cell Biol* **19**, 1178-1188 (2017).

804

805

806 **ACKNOWLEDGEMENTS**

807 This work was supported in part by the National Institutes of Health National Cancer Institute  
808 grant CA096840 (E.H.B.), UCSF Brain Tumor SPORE Developmental Project Grant (E.H.B.),  
809 W.M. Keck Foundation Medical Research Grant (B.H.), and the Damon Runyon Cancer  
810 Research Foundation Postdoctoral Fellowship DRG2168-13 (T.T.C.). B.H. is a Chan  
811 Zuckerberg Biohub investigator. We thank Geeta Narlikar, John Murnane, Jue Lin and Dana  
812 Smith for the stimulating scientific discussions and critical edits of the manuscript; Barbara  
813 Panning for insightful scientific discussions; Bradley Stohr, Lifeng Xu, Tom Misteli, and Adam  
814 Larson for reagent sharing; Beth Cimini, Stephanie Johnson, and Yina Wang for discussions on  
815 image analyses; Oria Lu for technical help.

816

817 **AUTHOR CONTRIBUTIONS**

818 T.T.C. and E.H.B. designed the experiments. T.T.C., X.S. and E.H.B. wrote the manuscript;  
819 T.T.C., J.H.W. and G.S. performed the experiments; X.S. and G.J. performed the STORM  
820 imaging. T.T.C., X.S, G.J., G.S., B.H. and E.H.B. analyzed the data. All authors provided  
821 feedback on the manuscript.

822

823 **COMPETING INTERESTS**

824 The authors declare no competing interests.

825

826 **CORRESPONDING AUTHOR**

827 Correspondence to Elizabeth H. Blackburn.

828

829 **FIGURE LEGENDS**

830  
831  
832  
833  
834  
835  
836  
837  
838  
839  
840  
841  
842  
843  
844  
845  
846  
847  
848  
849  
850  
851  
852  
853  
854

### Figure 1. Tethered HP1 $\alpha$ at telomeres locally increases H3K9me3

(a) Schematic of HP1 $\alpha$  fused to TRF1. HP1 $\alpha$  consists of a chromodomain (CD), a hinge, and a chromo shadow domain (CSD); AA (amino acid). (b-d) Fluorescence imaging of UM-UC3 cells co-transfected with mCherry-tagged TRF2 and EGFP-TRF1, EGFP-HP1 $\alpha$ , or EGFP-TRF1HP1 $\alpha$ -fusion 48h after transfection ( $n = 15-21$  nuclei). (b) Representative images. mCherry shown as magenta in merged image. Bar: 10  $\mu$ m. (c) Quantification of % EGFP area per nucleus \*\*\*\* $p < 0.0001$ ; n.s. (no significance). (d) Quantification of % telomere per nucleus with colocalization of EGFP and mCherry \*\* $p = 0.0065$ ; \*\*\*\* $p < 0.0001$ . The high apparent colocalization of HP1 $\alpha$  with TRF2 (within the HP1 $\alpha$  group) is partly caused by random, co-incident overlaps with telomeres due to widespread HP1 $\alpha$  spots; X-Y planes are projections of z-stacks. (c-d) Significance is assessed by one-way ANOVA and Dunnett's multiple comparison test with 95% confidence level. Error bars represent standard error of the mean (s.e.m.). (e) Experimental set-up for ChIP to follow the localization of stably expressed TRF1HP1 $\alpha$  in UM-UC3 after blasticidin selection (Bsd) at  $\sim$ PD25. (f) Experimental groups are immunoprecipitated with the indicated antibodies, and hybridized on a dot blot with either telomere or control centromere (CENPB) probe ( $n = 3$  independent replicates). Upon signal normalization to 10% input, (g) TRF1HP1 $\alpha$  shows increased HP1 $\alpha$  at telomeres compared to controls Vector only (Vonly), TRF1 and HP1 $\alpha$  \*\*\*\* $p < 0.0001$ ; (h) TRF1HP1 $\alpha$  shows decreased H3 at telomeres \* $p = 0.0133$ . Upon normalization to H3 signal, (i) TRF1HP1 $\alpha$  shows increased H3K9me3 at telomeres per H3 \* $p = 0.0101$  while (j) there is no significant change of TRF2 occupancy at telomeres. n.s. (no significance) (g-j) The values for three independent experiments (Supplementary Fig. 1) are used to calculate the s.e.m. for each group. P-values are calculated by two-tailed unpaired  $t$ -test with 95% confidence level.

855  
856  
857  
858  
859  
860  
861  
862  
863  
864  
865  
866  
867  
868  
869  
870  
871  
872  
873

### Figure 2. Telomere-tethered HP1 $\alpha$ attenuates telomere extension by telomerase but does not accelerate replicative senescence

(a) Experimental set-up to study the impact of HP1 $\alpha$  on telomerase-based telomere extension in UM-UC3. 1<sup>st</sup> infection: EGFP-tagged Vonly, TRF1, HP1 $\alpha$ , or TRF1HP1 $\alpha$ . (b) Telomere length analysis of TRF1HP1 $\alpha$ , various controls, and untreated parental cells (Prn) with WThTR overexpression from PD0 to  $\sim$ PD30. (c) Quantification (average telomere length) shows TRF1HP1 $\alpha$  attenuated the WThTR overexpression-induced telomere extension. Similar findings are observed in two independent replicates. (d) Qualitative  $\beta$ -gal staining of BJ fibroblasts with earlier versus later PD. Bar: 100  $\mu$ m. (e) Quantifications of relative  $\beta$ -gal fluorescence units are normalized to  $\mu$ g of protein. BJ PD68 shows significantly more beta-gal fluorescence than BJ PD34 \*\*\*\* $p < 0.0001$ . Two independent experiments; each contains triplicates. Error bars represent s.e.m. P-values are calculated by two-tailed unpaired  $t$ -test with 95% confidence level. (f) Experimental set-up to determine if TRF1HP1 $\alpha$  accelerates replicative senescence. These analyses were performed only 10-12 days after infection, and during that period ( $\sim$ 5-6 PDs) telomere shortening was minimal. Thus, it is unlikely that the lack of any effect on  $\beta$ -gal was due to adaptive compensation by other proteins or selection of cell subpopulations. Fibroblasts (g) BJ (PD67-70) or (h) WI-38 (PD44) show no significant difference in  $\beta$ -gal signal. BJ, three independent experiments each contain triplicates. WI-38, single experiment with triple replicates. Error bars represent s.e.m.

874  
875  
876  
877  
878

### Figure 3. Ligand binding function of HP1 $\alpha$ CSD controls telomere extension.

(a) Schematic diagram of mutations in HP1 $\alpha$  fused to TRF1 (AA – amino acid). CD mutant V22M; CSD mutants I165A and W174A; N-terminal phosphorylation deficient mutant NS2A; hinge mutant KRKAAA (b) Transient co-transfection of mCherry-tagged TRF2 (magenta in merged image) and various EGFP-tagged TRF1HP1 $\alpha$  mutants respectively in UM-UC3 cells

879 imaged after 48h. Bar: 10  $\mu$ m. ~20 nuclei were counted per group in (c) and (d). (c)  
880 Quantification of % GFP area per nucleus \*\*\*\* $p < 0.0001$ ; \* $p = 0.0260$ ; n.s. (no significance).  
881 Significance is assessed by one-way ANOVA and Dunnett's multiple comparison test with 95%  
882 confidence level. (d) Quantification of % telomeres per nucleus with colocalization of EGFP and  
883 mCherry. Consistently, V22M and V22MI165A showed fewer total fusion protein spots  
884 (Supplementary Fig. 4) because V22M lacks the ability to bind to other, widespread genomic  
885 regions. Thus, the slight reduction of % colocalization of V22M and V22MI165A with TRF2 is  
886 likely to be at least partially because of fewer random overlaps of telomeres with widespread  
887 HP1 $\alpha$  spots. (e) Quantification of TRF2 foci;  $n = \sim 20$  nuclei per group. (c-e) Error bars  
888 represent s.e.m. (f-g) Telomere length analyses of TRF1HP1 $\alpha$ , WT or HP1 $\alpha$  mutant variants  
889 with WT hTR overexpression across PD0 to ~PD30. (h-i) Quantifications (average telomere  
890 length) show CSD mutants I165A, W174A or double mutant V22MI165A revert the telomere  
891 extension attenuation phenotype of TRF1HP1 $\alpha$ . Similar findings were observed in two  
892 independent experiments.

893  
894 **Figure 4. TRF1HP1 $\alpha$  results in reduced TIFs induced by mutant hTR expression**  
895 Cells stably expressing TRF1HP1 $\alpha$  (WT or mutant variants of HP1 $\alpha$ ) were infected with  
896 lentivirus containing WT hTR, or mutant hTR (47A or TSQ1) on Day 0, selected for stable  
897 expression after 48h, and analyzed on Day 5. (a) Fluorescence microscopy images of  
898 representative cells expressing mutant hTR 47A stained for telomeres (Tel) using peptide  
899 nucleic acid (PNA) probes (magenta in merged image) via fluorescent *in situ* hybridization  
900 (FISH), antibody against DNA damage repair protein marker 53BP1 (green in merged image),  
901 and counterstained with DAPI. Zoom-in images (the last row) correspond to yellow-squared  
902 regions of the row above. (b) % TIF per telomere of each nucleus is quantified;  $n = 94$ -159  
903 nuclei combining data of 3 independent experiments. \*\*\*\* $p < 0.0001$ ; n.s. (no significance). (a-b)  
904 Bar: 10  $\mu$ m. (c) Upon TSQ1 expression, TRF1HP1 $\alpha$  results in fewer TIFs compared to Vonly,  
905 TRF1 or HP1 $\alpha$  controls. TRFHP1 $\alpha$  ~11.4% shows decreased TIFs compared to Vonly: ~19.7%  
906 \*\*\* $p = 0.0008$ ; TRF1: ~20.4% \*\*\* $p = 0.0005$ ; HP1 $\alpha$ : ~17.9% \* $p = 0.0137$  ( $n = 30$ -38 nuclei). (b-c)  
907 Significance is assessed by one-way ANOVA and Dunnett's multiple comparison test with 95%  
908 confidence level. (d) Fluorescence images of control cells overexpressing WT hTR ( $n = 27$ -36  
909 nuclei). Same color scheme as (a). TIFs quantification in the presence of (e) WT hTR or (f)  
910 Vonly ( $n = 28$ -36 nuclei) show minimal baseline DNA damage at telomeres. (b-c; e-f) Error bars  
911 represent s.e.m.

912 **Figure 5: TRF1HP1 $\alpha$  allele-specific protection effects upon si-TRF2-induced telomeric**  
913 **damage.**  
914 72 hr after transfection, (a) TRF2 knockdown efficiency with antibody against TRF2 (anti-TRF2)  
915 and GAPDH (anti-GAPDH) as loading control. (-) si-non-targeting; (+) si-TRF2. Quantification of  
916 TIFs in (b) si-non-targeting ( $n = 32$ -47 nuclei per group), (c) si-TRF2. left \* $p = 0.0188$ , right \* $p =$   
917 0.0192, \*\* $p = 0.0042$  \*\*\*\* $p < 0.0001$  ( $n = 31$ -48 nuclei per group). (b-c) Significance is assessed  
918 by one-way ANOVA and Dunnett's multiple comparison test with 95% confidence level. Error  
919 bars represent s.e.m. Note the similar pattern among TRF1HP1 $\alpha$  alleles in Fig. 5c compared to  
920 the corresponding allele pattern in Fig. 4b.

921  
922  
923 **Figure 6. TRF1HP1 $\alpha$  increases the fraction of irregular-shaped telomeres analyzed by**  
924 **STORM (a) Similar telomere length (average and length distribution) across TRF1HP1 $\alpha$ , I165A**  
925 **and control groups (TRF1, HP1 $\alpha$ ) at the time of analysis. (b) Top: Widefield conventional**  
926 **fluorescence image of representative UM-UC3 nucleus hybridized with Cy5-end-labeled C-**  
927 **strand telomeric PNA FISH probe. Images acquired contain ~35,000 frames with a z-depth-**  
928 **range of ~700 nm. Middle: the corresponding STORM image. Bottom: Overlay of conventional**

929 and STORM images. Bar: 5  $\mu\text{m}$ . **(c)** Top: Representative reconstructed single telomere STORM  
 930 images of TRF1HP1 $\alpha$  and each corresponding Rg (nm) across a gradient. Bottom:  
 931 Corresponding raw images of individual signal localization spots (displayed as dots) prior to  
 932 image processing and reconstruction. Bar: 100 nm. **(d-g)** Rg of individual telomeres (dots) in 19  
 933 nuclei analyzed for each group **(d)** TRF1, **(e)** HP1 $\alpha$ , **(f)** TRF1HP1 $\alpha$  or **(g)** TRF1HP1 $\alpha$ 165A. Y-  
 934 axis: Rg (nm). X-axis: nucleus index. Each individual nucleus is distinguished by a different  
 935 color. Each dot corresponds to one telomere. **(h)** Distribution of Rg (nm) represented as a violin  
 936 plot showing frequency (width of density plot), median (white dot), interquartile range (bar) and  
 937 95% confidence interval (line). TRF1 ( $n = 38$  nuclei, 437 telomeres), HP1 $\alpha$  ( $n = 19$  nuclei, 264  
 938 telomeres), TRF1HP1 $\alpha$  ( $n = 47$  nuclei, 552 telomeres) and TRF1HP1 $\alpha$ 165A ( $n = 27$  nuclei, 451  
 939 telomeres). Means of Rg are compared using ANOVA Tukey's multiple comparisons with 95%  
 940 confidence level \*\*\*\* $p < 0.0001$ ; left \*\*\* $p = 0.0003$ ; right \*\*\* $p = 0.0001$ ; n.s. (no significance)  
 941 Mean of TRF1 Rg (84 nm) indicated as cut-off (dashed line) and **(i)** Fractions of Rg equal or  
 942 greater than the 84 nm cut-off in experimental groups.  
 943  
 944

945 **Figure 7. Model for how enhanced heterochromatin by telomere-tethered HP1 $\alpha$  impacts**  
 946 **telomere maintenance.** Diagram of working model. See text for details.  
 947  
 948

|                             | Baseline | TRF1HP1 $\alpha$ |      |       |       |      |        |
|-----------------------------|----------|------------------|------|-------|-------|------|--------|
|                             |          | WT               | V22M | I165A | W174A | NS2A | KRKAAA |
| <b>Telomere Lengthening</b> | +++      | +                | +    | +++   | ++    | +    | +      |
| <b>TIF via 47A</b>          | +++      | +                | +    | +++   | ++    | ++   | ++     |
| <b>TIF via siTRF2</b>       | +++      | +                | +    | +++   | ++    | +    | +      |

949  
 950 **Table 1. Summary of experimental data describing impact of WT versus mutants**  
 951 **TRF1HP1 $\alpha$  on telomere lengthening and TIF (via 47A or TRF2 depletion).** +++ (strong  
 952 telomere lengthening, high number of TIF), ++ (intermediate phenotype), + (weak telomere  
 953 lengthening, low number of TIF).  
 954

955



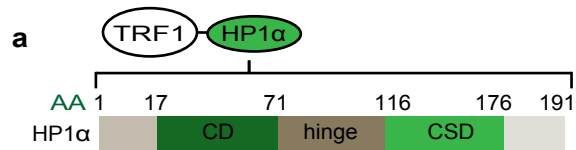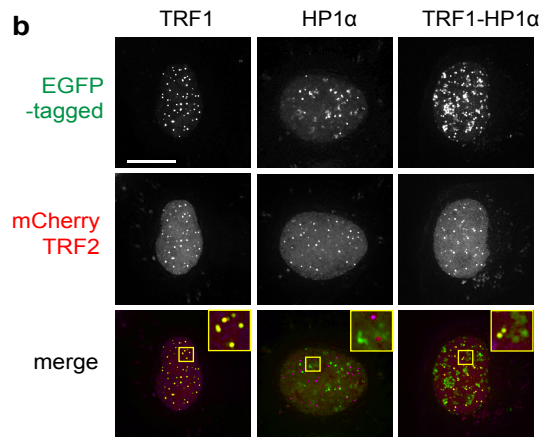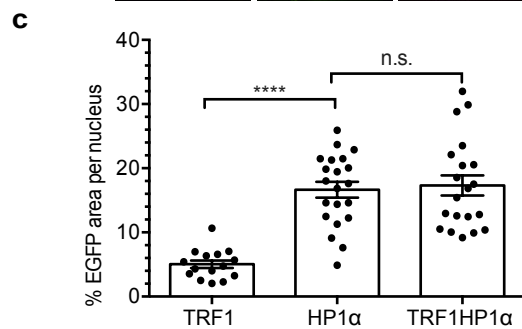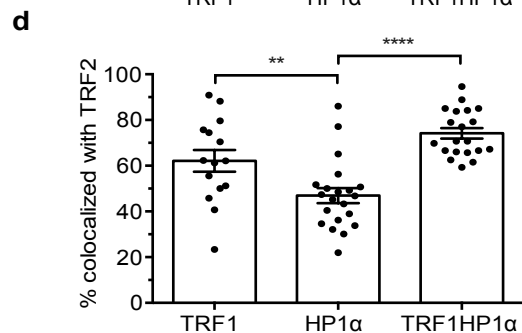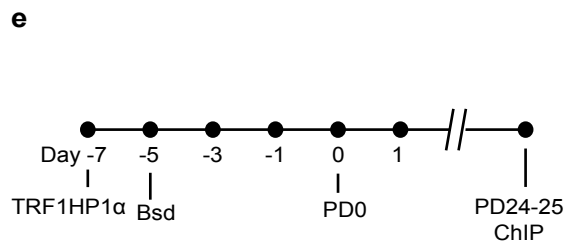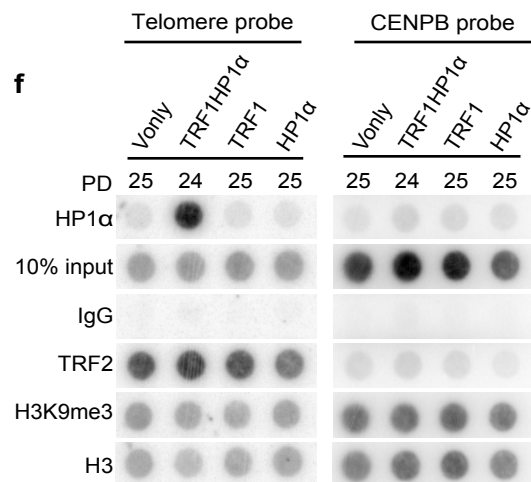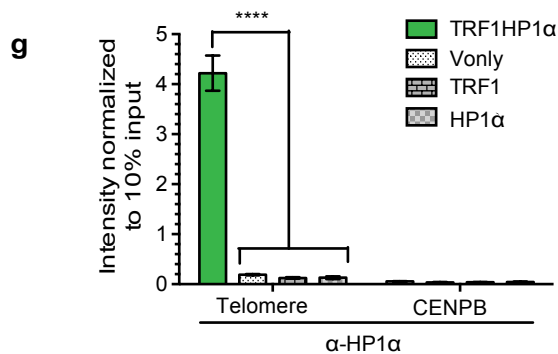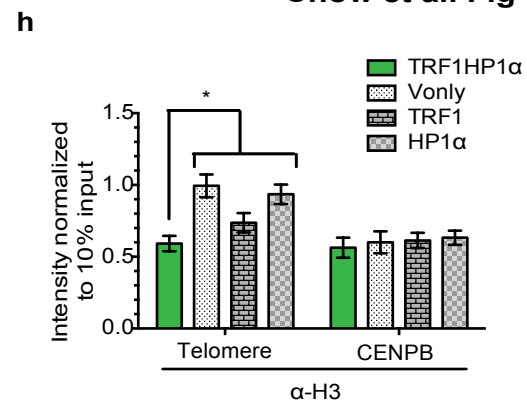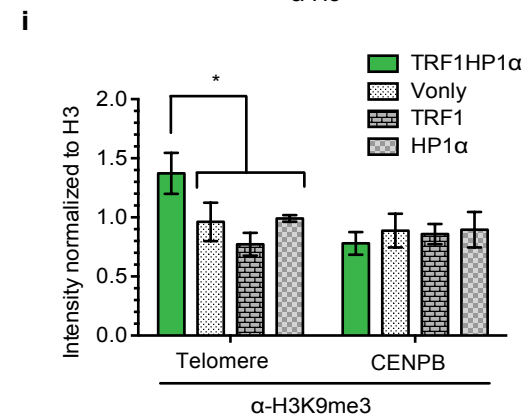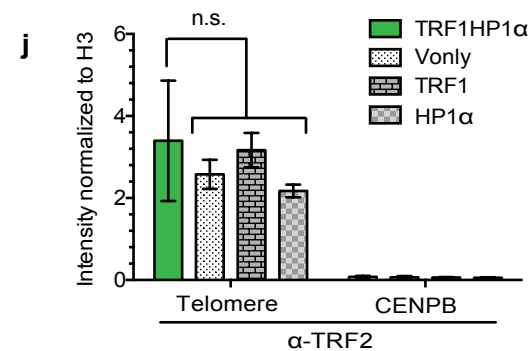

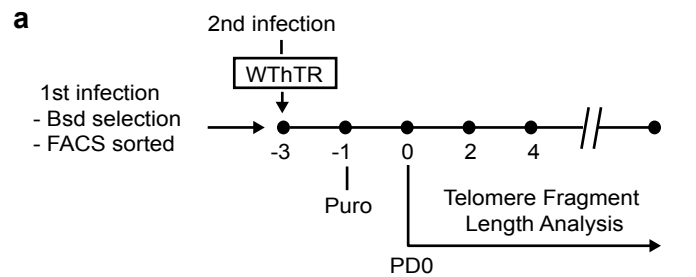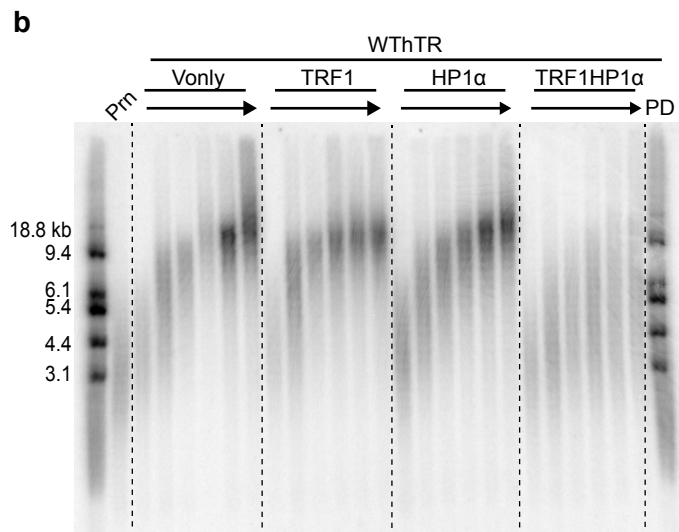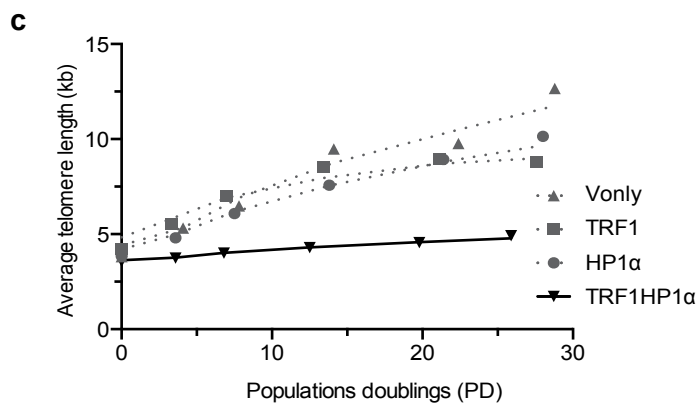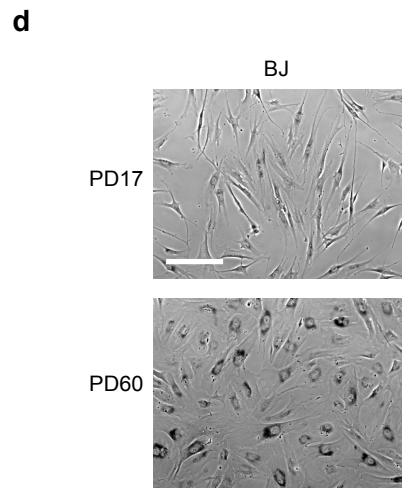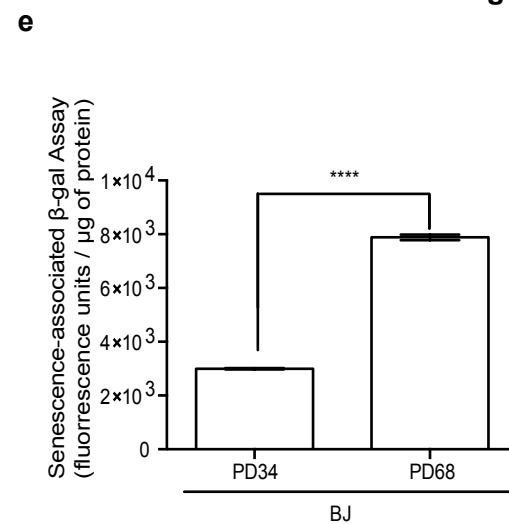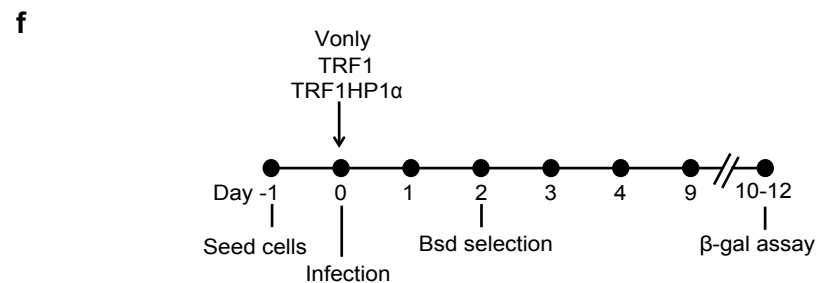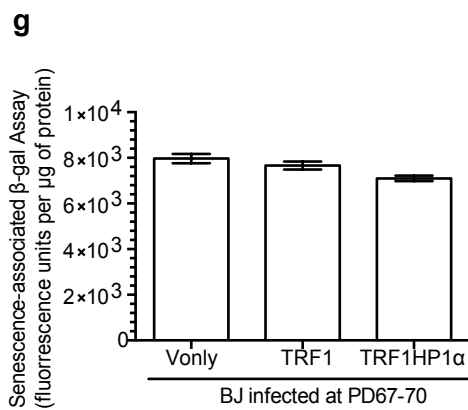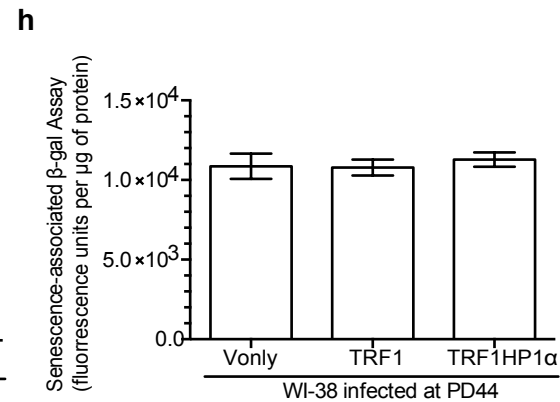

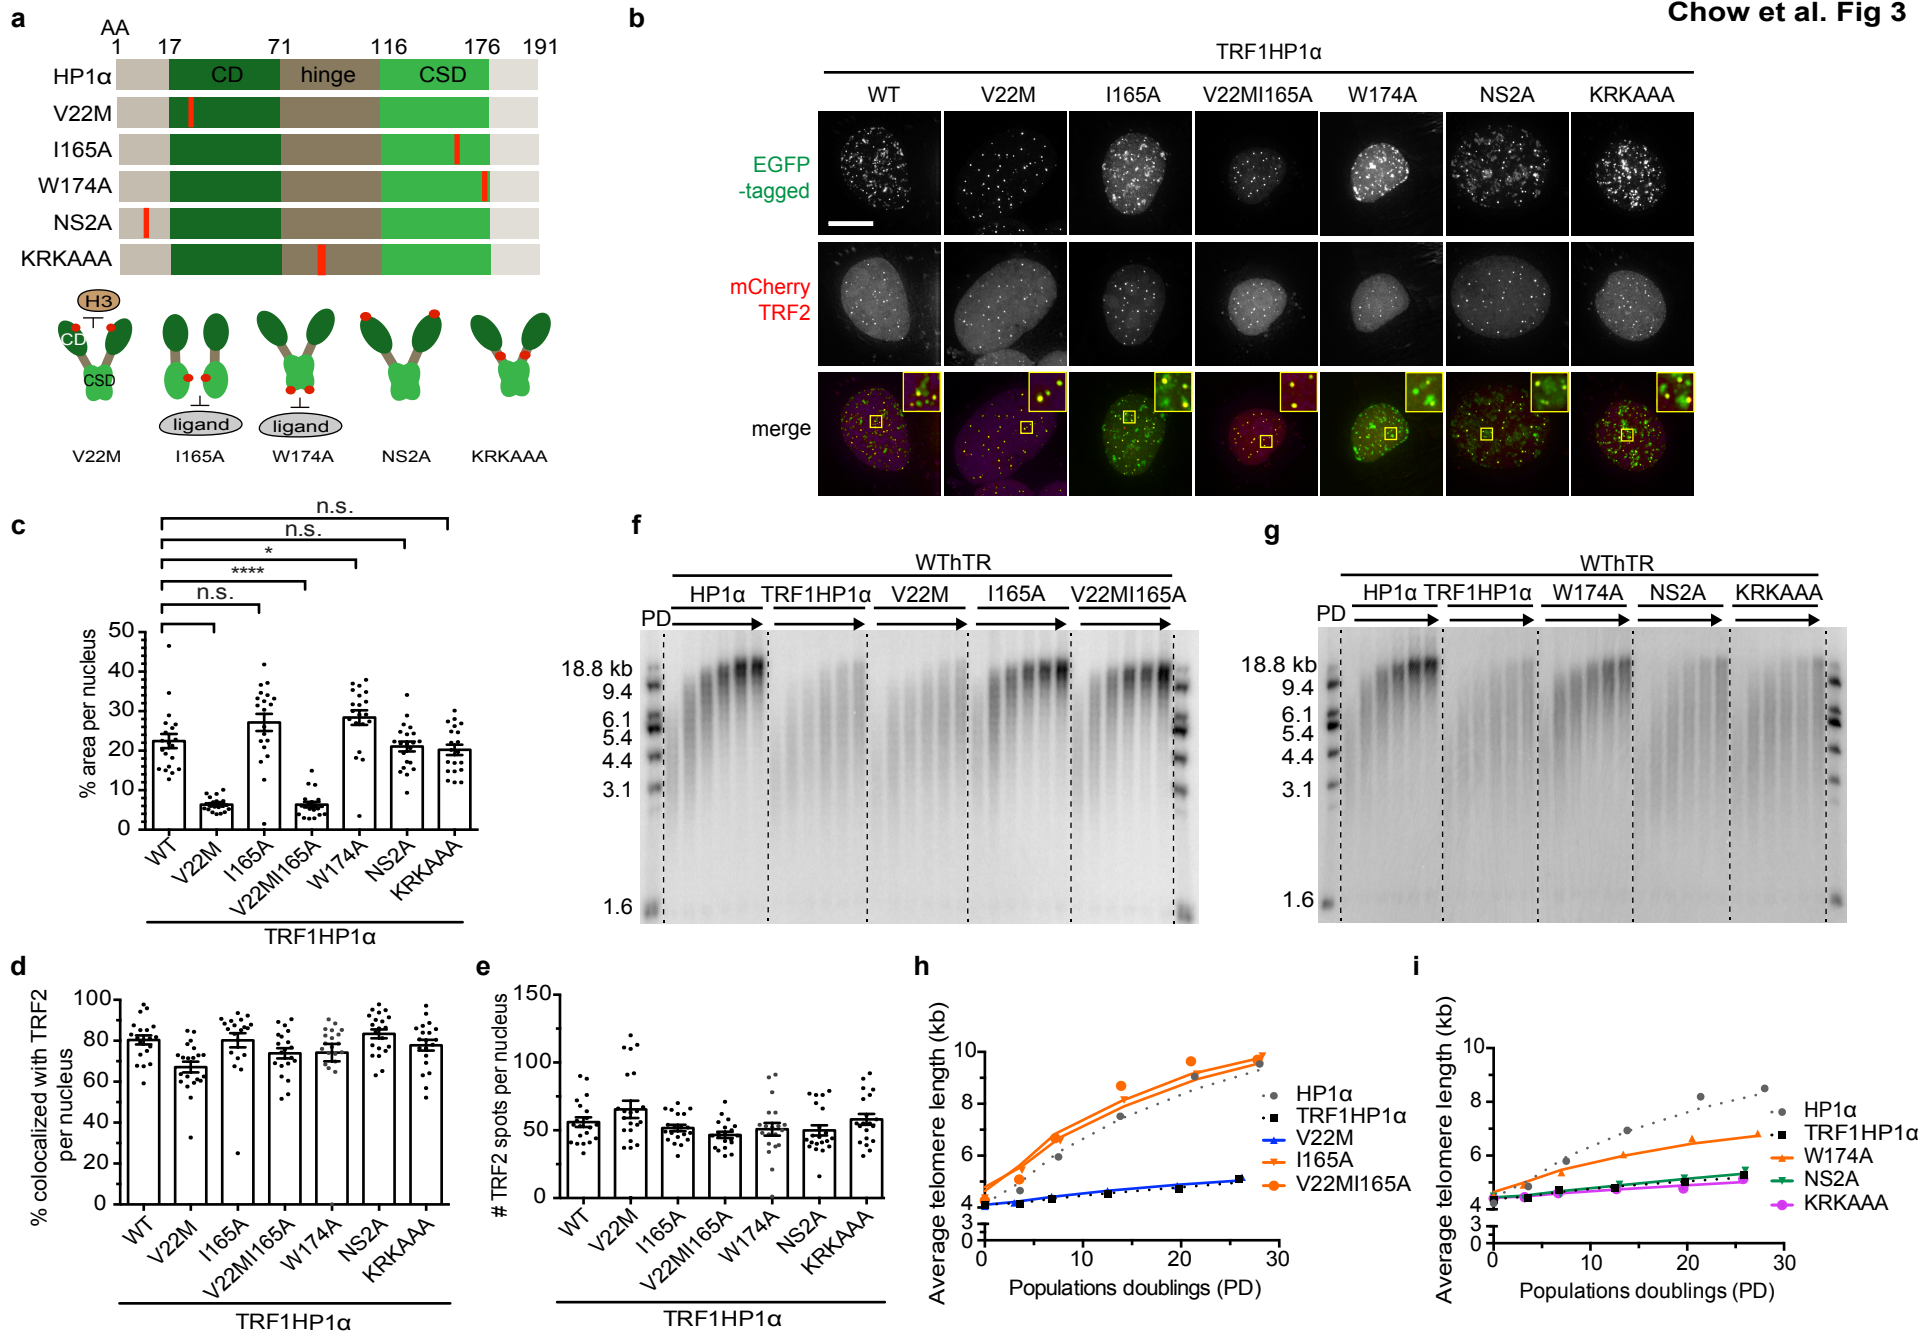

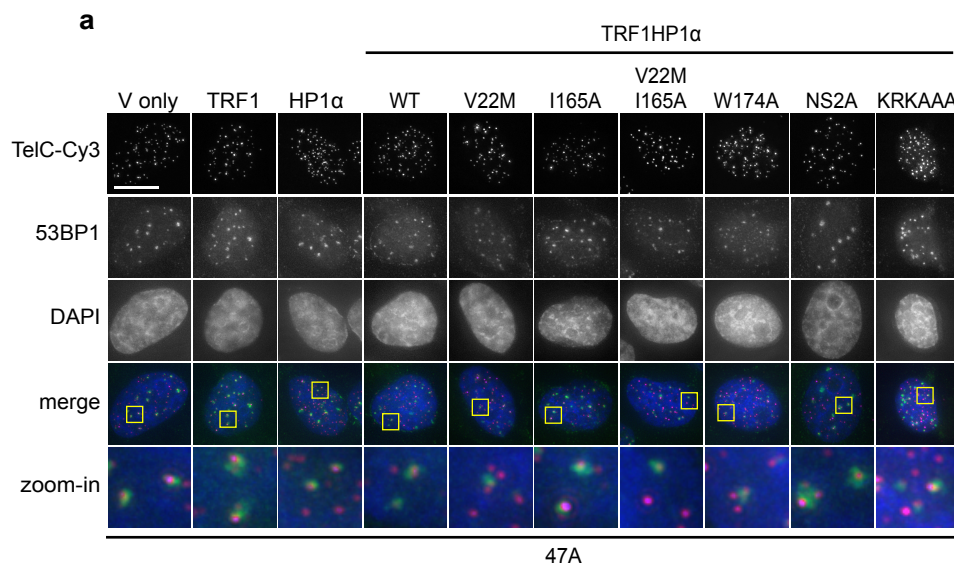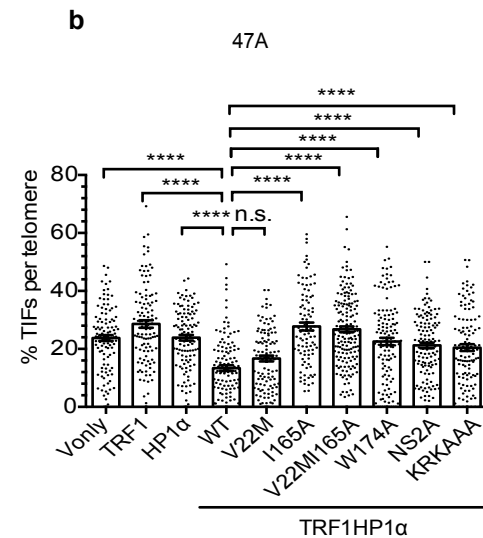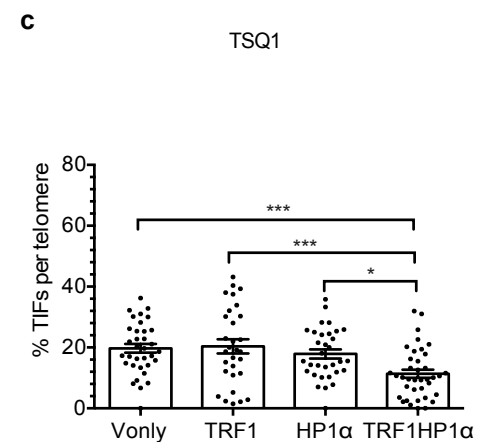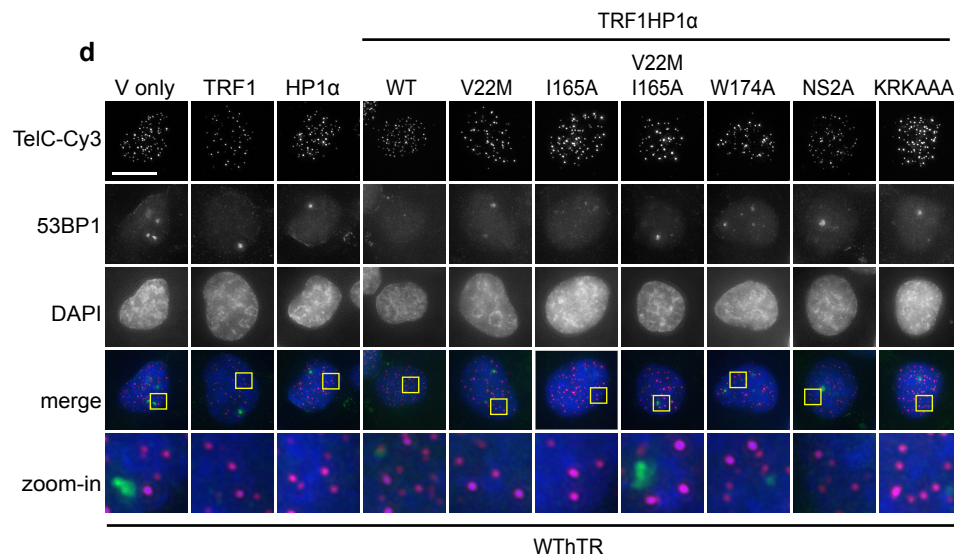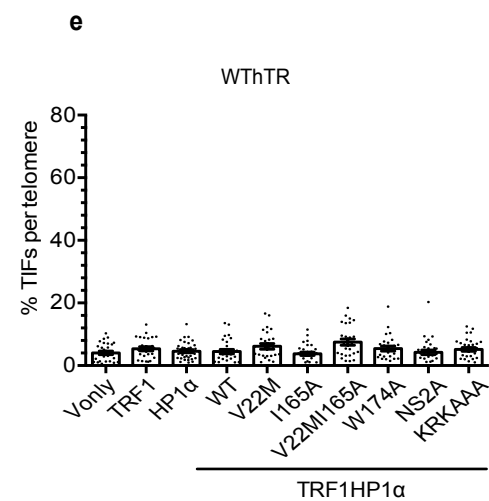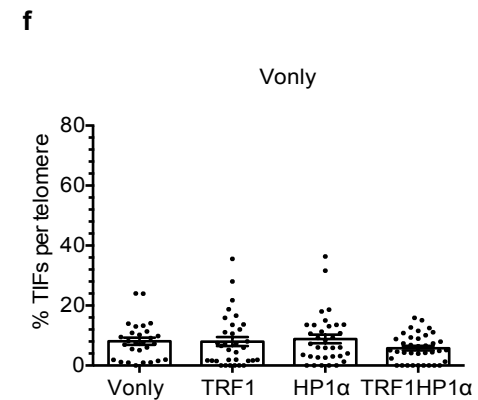

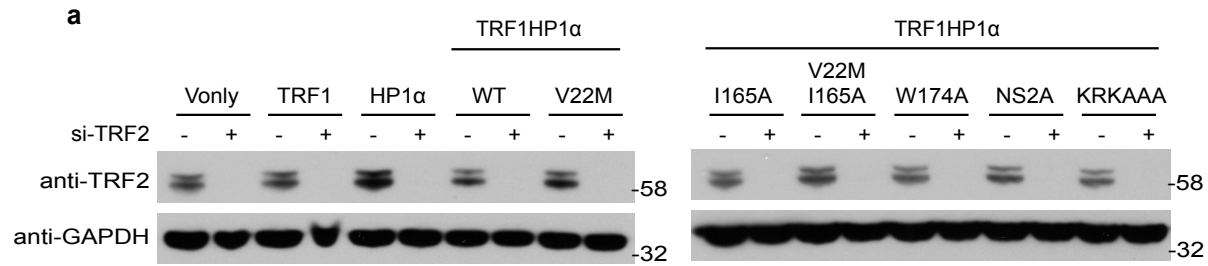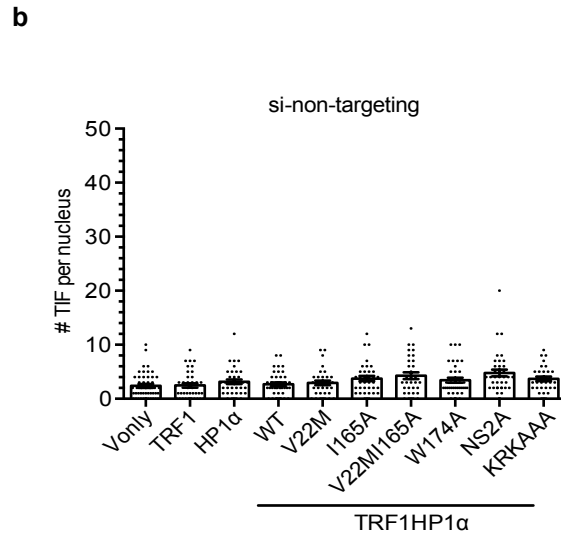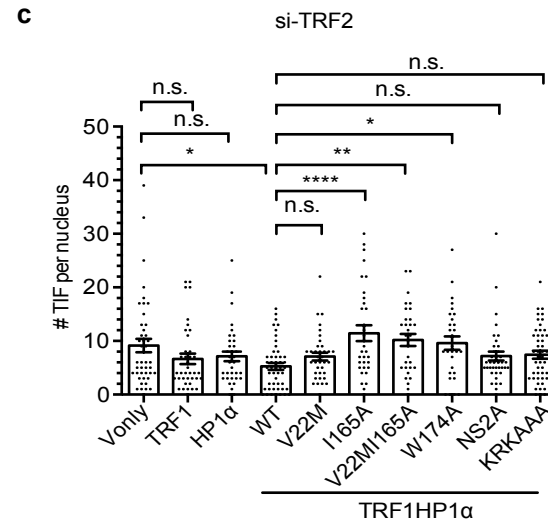

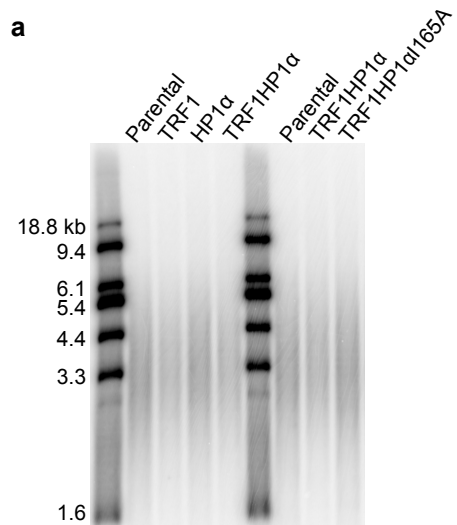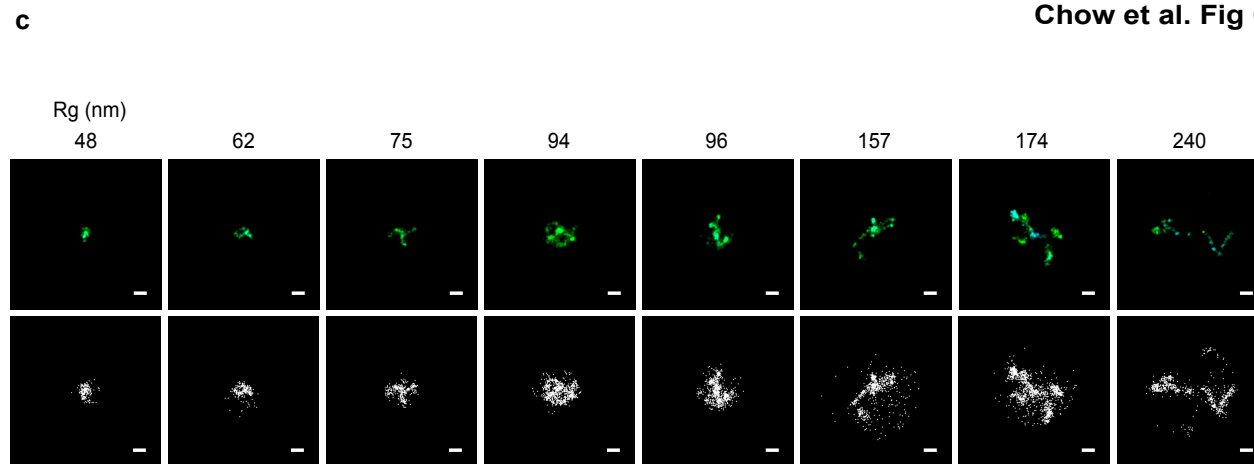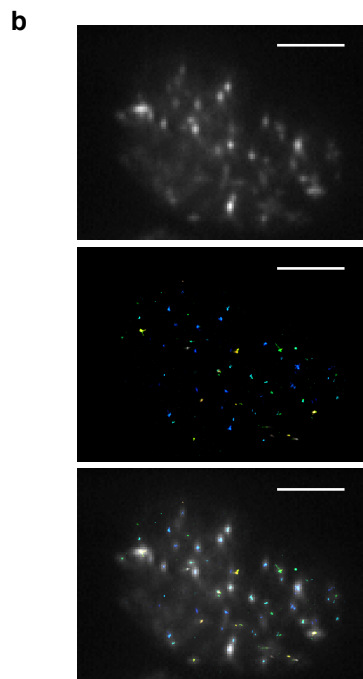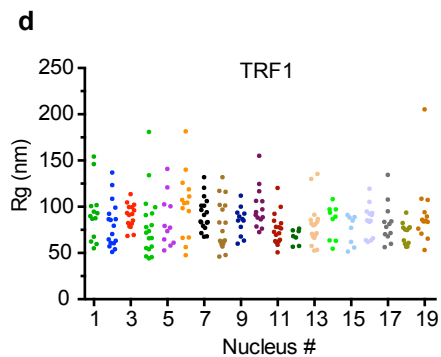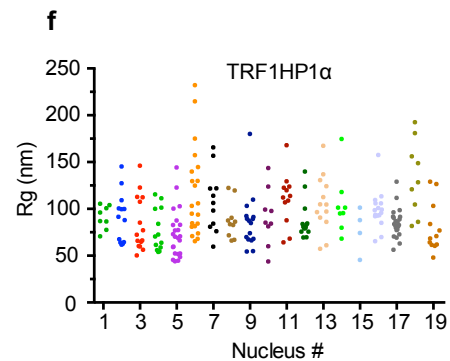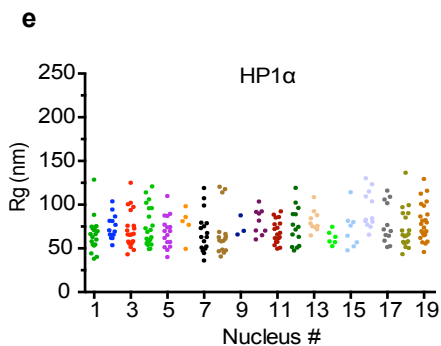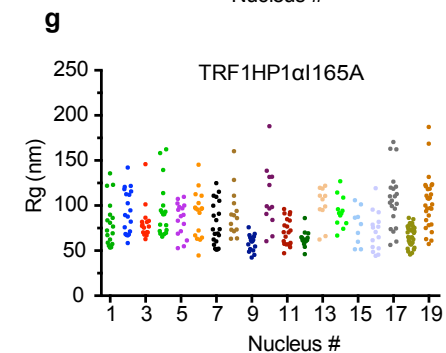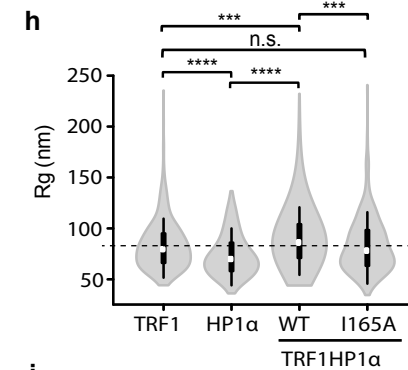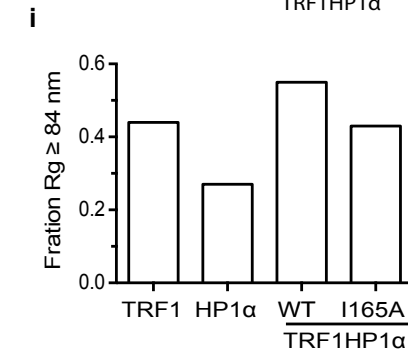

Chow et al. Fig 7

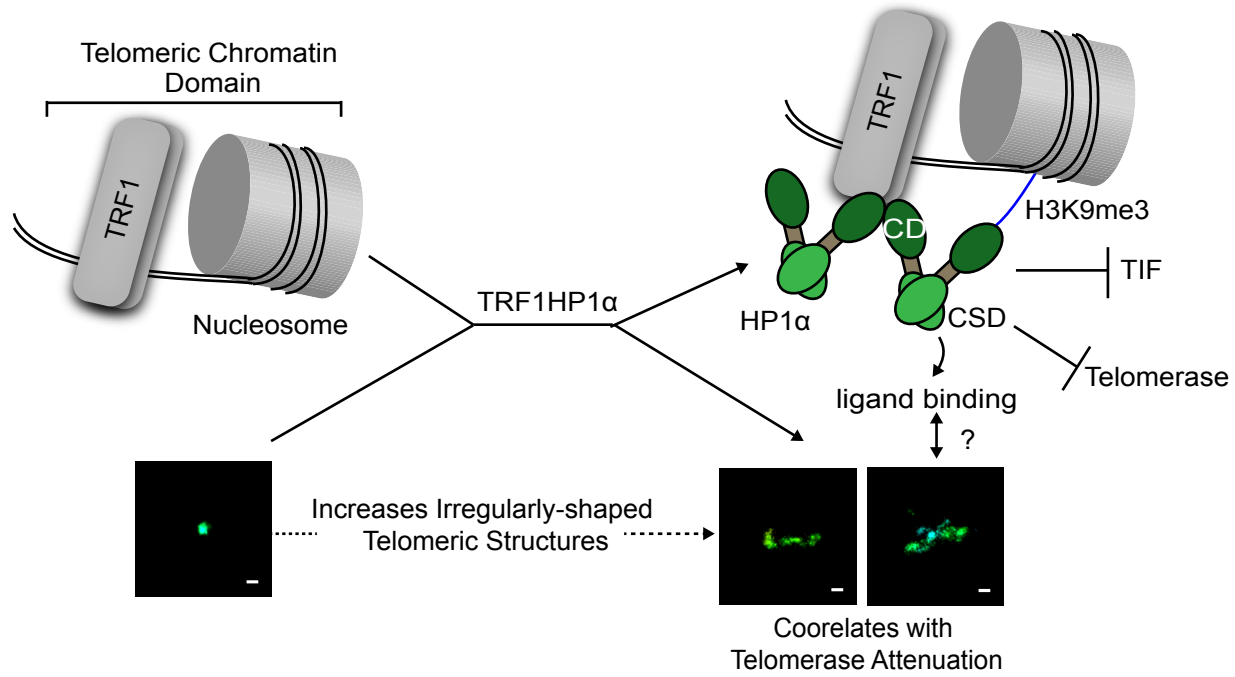

Source: https://www.biorxiv.org/content/10.1101/368464v1.full.pdf
